# Supplementary material
Source: Springer Nature journal article supplement (https://www.springermedizin.de/resource/supplementary/13002_2014_430_MOESM1_ESM.pdf/9626904)
Supplement: MOESM1 [file 9626904]

**Additional file 1: List of useful plants used in the Municipality of Rayones, Nuevo León, México. Number after plant author MG (Miriam Garza, number of collection).**

| Scientific name                                            | Common name          | Uses               | Part used      | Method of use                                                        |
|------------------------------------------------------------|----------------------|--------------------|----------------|----------------------------------------------------------------------|
| ACANTHACEAE                                                |                      |                    |                |                                                                      |
| <i>Justicia spicigera</i><br>Schltdl., MG 255              | Tintoreta            | Ornamental         | Complete plant | Planted in gardens                                                   |
| AGAVACEAE                                                  |                      |                    |                |                                                                      |
| <i>Agave americana</i> L. var<br><i>americana</i> , MG 327 | Maguey               | Urinary system     | Sap            | Boiled, drink                                                        |
|                                                            |                      | Food               | Flowers        | Cooked                                                               |
|                                                            |                      |                    | Sap            | Mezcal<br>(fermented)                                                |
|                                                            |                      | Living fences      | Plant          | Planted in the<br>gardens                                            |
|                                                            |                      | Ornamental         | Plant          | Planted in the<br>gardens                                            |
|                                                            |                      | Forage             | Leaves         | Raw                                                                  |
|                                                            |                      | Veterinary         | Pulp leaves    | Splinting borken<br>legs                                             |
| <i>Agave bracteosa</i><br>S. Watson ex Engelm.,<br>MG 349  | Amole de<br>castilla | Inflammation       | Root           | Boiled, as<br>poultice, applying<br>directly on the<br>affected area |
|                                                            |                      | External schoks    | Root           | Mixed with<br>canela and <i>Acacia<br/>farnesiana</i> bark<br>chips  |
| <i>Agave lecheguilla</i> Trel.,<br>MG 328                  | Lechuguilla          | Bruises            | Root (pulp)    | Boiled, drink the<br>solution                                        |
|                                                            |                      | Inlamation         | Root (pulp)    | Boiled, as<br>poultice, applying<br>directly on the<br>affected area |
|                                                            |                      | Internal<br>wounds | Root (pulp)    | Boiled, drink the<br>solution                                        |
|                                                            |                      | Purify blood       | Root (pulp)    | Boiled, drink the<br>solution                                        |
|                                                            |                      | Depression         | Root (pulp)    | Boiled, drink the<br>solution                                        |
|                                                            |                      | Stomach ache       | Root (pulp)    | Boiled, drink the                                                    |

|                                                  |                         |                            |                           |                                                      |
|--------------------------------------------------|-------------------------|----------------------------|---------------------------|------------------------------------------------------|
|                                                  |                         |                            |                           | solution                                             |
|                                                  |                         | Alopecia                   | Root (pulp)               | Boiled, spread the solution on the head like shampoo |
|                                                  |                         | Forage                     | Root; flowers             | Ground, raw; raw                                     |
|                                                  |                         | Food                       | Flowers                   | Cooked, with eggs and bacon                          |
|                                                  |                         | Fibers                     | Leaves                    | Scraped into fibers, to make laves                   |
|                                                  |                         | Dandruff                   | Root (pulp)               | Dried, ground, then boiled and spread over the head  |
| <i>Agave lophantha</i> Schiede ex Kunth, MG 326  | Lechuguilla de castilla | Pains                      | Root                      | Boiled, drink as tea                                 |
| <i>Agave scabra</i> Ortega, MG 471               | Maguey or cuajo rayado  | Prevention of heart attack | Stem pulp                 | Boiled, drink the solution                           |
| <i>Brahea dulcis</i> (Kunth) Mart., MG 348       | Palmito                 | Fibers                     | Young leaves              | Woven fibers to make chair and benches               |
|                                                  |                         | Ceremonial                 | Complete leaves           | Part of the bouquets                                 |
| <i>Polianthes tuberosa</i> L., MG 350            | Nardo                   | Ornamental                 | Complete plant            | Cultivated in the gardens                            |
| <i>Yucca filifera</i> Chabaud, MG 413            | Palma datilera          | Food                       | Fruits                    | Raw, sweet flavor                                    |
|                                                  |                         | Food                       | Flowers                   | Called "chochas", cooked, very popular food          |
|                                                  |                         | Living fences              | Complete plant            | Planted in gardens                                   |
|                                                  |                         | Ornamental                 | Complete plant            | Planted in gardens                                   |
| AMARANTHACEAE                                    |                         |                            |                           |                                                      |
| <i>Amaranthus palmeri</i> S. Watson, MG 256      | Quelite                 | Anemia                     | Leaves and inflorescences | Boiled, drink the solution                           |
|                                                  |                         | Food                       | Leaves                    | Cooked                                               |
|                                                  |                         | Forage                     | Complete plant            | Dried, raw                                           |
| AMARYLLIDACEAE                                   |                         |                            |                           |                                                      |
| <i>Eucharis grandiflora</i> Planch. & Linden, MG |                         | Ornamental                 | Complete plant            | Planted in gardens                                   |

|                                               |                              |                                  |                     |                                                      |
|-----------------------------------------------|------------------------------|----------------------------------|---------------------|------------------------------------------------------|
| 325                                           |                              |                                  |                     |                                                      |
|                                               |                              | Hepatitis                        | Leaves              | Boiled, take a bath with the solution                |
| ANACARDIACEAE                                 |                              |                                  |                     |                                                      |
| <i>Rhus virens</i> Lindh. ex A. Gray, MG 257  | Lantrisco                    | Diabetes                         | Leaves and branches | Boiled, drink as tea                                 |
|                                               |                              | Cholesterol                      | Leaves and branches | Boiled, drink as tea                                 |
|                                               |                              | Menstrual cramps                 | Leaves and branches | Boiled, drink as tea                                 |
|                                               |                              | Revitalizing                     | Bark                | Boiled, drink as tea                                 |
| <i>Schinus molle</i> L., MG 414               | Pirul                        | Cataracts                        |                     | Ground applied directly, applying directly into eyes |
|                                               |                              | Ceremonial                       | Leaves              | Purify the soul                                      |
|                                               |                              | Ornamental                       | Complete plant      | Planted in the gardens                               |
| APIACEAE                                      |                              |                                  |                     |                                                      |
| <i>Apium graveolens</i> L., MG 351            | Apio                         | Food and condiment               | Leaves              | Raw or cooked                                        |
| <i>Coriandrum sativum</i> L., MG 352          | Cilantro                     | Condiment                        | Leaves              | Raw or cooked                                        |
|                                               |                              |                                  |                     |                                                      |
| <i>Eryngium heterophyllum</i> Engelm., MG 448 | Hierba del sapo              | Cholestreol and diabetes control | Branches and leaves | Boiled, drink as tea                                 |
| <i>Foeniculum vulgare</i> Mill., MG 353       | Hinojo                       | Intestinal colic                 | Leaves              | Boiled, drink the solution                           |
|                                               |                              | Colic cramps                     | Leaves              | Boiled, mixed with canela bark, drink as tea         |
|                                               |                              | Promote milk production in women | Leaves              |                                                      |
| <i>Petroselinum sativum</i> Hoffm., MG 347    | Perejil                      | Stimulate appetite               | Leaves              | Raw, in salads                                       |
| APOCYNACEAE                                   |                              |                                  |                     |                                                      |
| <i>Nerium oleander</i> L., MG 470             | Laurel rosa or laurel blanco | Ornamental                       | Complete plant      | Planted in gardens (leaves highly poison if eaten)   |
| ARACEAE                                       |                              |                                  |                     |                                                      |
| <i>Syngonium podophyllum</i> Schott, MG 449   | Julieta                      | Ornamental                       | Complete plant      | Planted in gardens                                   |

|                                                                            |                                                         |                           |                 |                                                                             |
|----------------------------------------------------------------------------|---------------------------------------------------------|---------------------------|-----------------|-----------------------------------------------------------------------------|
| <i>Xanthosoma sagittifolium</i> (L.) Schott & Endl., MG 415                | Lampazo or cabeza                                       | Ornamental                | Complete plant  | Planted in gardens                                                          |
| <i>Zantedeschia aethiopica</i> (L.) Spreng., MG 469                        | Alcatraz                                                | Ornamental                | Complete plant  | Planted in the gardens                                                      |
| ARECACEAE                                                                  |                                                         |                           |                 |                                                                             |
| <i>Washingtonia filifera</i> (Linden ex André) H.Wendl. ex de Bary, MG 446 | Palma                                                   | Ornamental                | Complete plant  | Planted in gardens                                                          |
|                                                                            |                                                         | Forage                    | Flowers         | Raw, for goats                                                              |
|                                                                            |                                                         | Food                      | Flowers         | Cooked                                                                      |
| ASCLEPIADACEAE                                                             |                                                         |                           |                 |                                                                             |
| <i>Asclepias oenotheroides</i> Schltl. & Cham., MG 450                     | Hierba del cizote                                       | Cizotes (fungal diseases) | Sap milk        | Applied directly on the affected part                                       |
| ASPARAGACEAE                                                               |                                                         |                           |                 |                                                                             |
| <i>Sansevieria thyrsiflora</i> (Petagna) Thunb., MG 282                    | Huaco, guaco or lengua de suegra (mother in law tongue) | Bruises                   | Leaves          | Ground, applied directly in the affected part                               |
|                                                                            |                                                         | Insect bite               | Leaves and root | Ground, applied directly in the affected part                               |
|                                                                            |                                                         | Inflammation              | Leaves and root | Ground, applied directly in the affected part                               |
|                                                                            |                                                         | Gastritis                 | Root            | Fermented, drink the solution                                               |
|                                                                            |                                                         | Ceremonial                | Complete plant  | Bouquets                                                                    |
|                                                                            |                                                         | Ornamental                | Complete plant  | Planted in gardens                                                          |
| ASPHODELACEAE                                                              |                                                         |                           |                 |                                                                             |
| <i>Kalanchoe daigremontiana</i> Raym.-Hamet & H. Perrier, MG 354           | Oreja de burro                                          | High fever                | Leaves          | Ground, strain the pulp, applied as poultice, and also, drink the remainder |
| <i>Aloe vera</i> (L.) Burm.f., MG 357                                      | Sábila                                                  | Acne                      | Leaves          | Ground, as poultice in the affected area                                    |

|  |  |                             |                 |                                                   |
|--|--|-----------------------------|-----------------|---------------------------------------------------|
|  |  | Cicatrizant                 | Leaves          | Ground, as poultice in the affected area          |
|  |  | Skin diseases               | Leaves          | Ground, as poultice in the affected area          |
|  |  | Insect bites                | Leaves          | Ground, as poultice in the affected area          |
|  |  | Remove spines from the skin | Leaves          | Ground, as poultice in the affected area          |
|  |  | Inflammation                | Leaves          | Ground, toasted, as poultice in the affected area |
|  |  | Skin burn                   | Leaves          | Ground, toasted, as poultice in the affected area |
|  |  | Lose weight                 | Leaves          | Ground, as poultice in the affected area          |
|  |  | Diabetes                    | Leaves          | Liquefied, drink on an empty stomach              |
|  |  | Cough                       | Leaves          | Liquefied, drink                                  |
|  |  | Gastritis                   | Leaves          | Liquefied, drink on an empty stomach              |
|  |  | Cancer                      | Leaves          | Liquefied, drink                                  |
|  |  | Pain of angina              | Root            | Ground, drink as tea                              |
|  |  | Backache                    | Leaves          | Ground, as poultice in the affected area          |
|  |  | Ceremonial                  | Complete plant  | Bouquets                                          |
|  |  | Wounds                      | Leaves          | Ground, as poultice in the affected area          |
|  |  | Intestinal colic            | Leaves          | Ground, raw, eat                                  |
|  |  | Bracing                     | Leaves          | Liquefied, raw, drink                             |
|  |  | Antibiotic                  | Leaves and root | Liquefied, raw, drink                             |

|                                                                |                           |                         |                              |                                                                                                                                                     |
|----------------------------------------------------------------|---------------------------|-------------------------|------------------------------|-----------------------------------------------------------------------------------------------------------------------------------------------------|
| <i>Asphodelus fistulosus</i> L.,<br>MG 356                     | Cebollín or<br>cebolleta  | Varices                 | Leaves and<br>bulbs          | Ground, spread<br>the pulp in the<br>affected area                                                                                                  |
| ASTERACEAE                                                     |                           |                         |                              |                                                                                                                                                     |
| <i>Achillea millefolium</i> L.,<br>MG 346                      | Real de oro,<br>milenrama | Intestinal colic        | Branches and<br>leaves       | Boiled, drink as<br>tea                                                                                                                             |
|                                                                |                           | Menstrual<br>cramps     | Branches and<br>leaves       | Boiled, drink as<br>tea                                                                                                                             |
|                                                                |                           | Strengthen<br>gums      | Branches and<br>leaves       | Boiled, swish<br>around the mouth,<br>drink as tea                                                                                                  |
|                                                                |                           | Ceremonial              | Complete<br>plant            | Dried, passed<br>over the body<br>(frightened<br>people)                                                                                            |
| <i>Artemisia absinthium</i> L.,<br>MG 355                      | Ajenjo                    | Stomach pain            | Leaves                       | Boiled, drink as<br>tea                                                                                                                             |
| <i>Artemisia ludoviciana</i><br>Nutt., MG 473                  | Estafiate                 | Intestinal colic        | Leaves                       | Boiled, drink as<br>tea                                                                                                                             |
|                                                                |                           | Diarrhea                | Leaves and<br>inflorescences | Boiled, drink as<br>tea                                                                                                                             |
|                                                                |                           | Intestinal<br>parasites |                              | Boiled, mixed<br>with leaves of<br><i>Matricaria<br/>recutita</i> , <i>Prunus<br/>persica</i> and<br><i>Mentha piperita</i> ,<br>drink the solution |
|                                                                |                           | Vomit                   | Branches                     | Boiled, drink as<br>tea                                                                                                                             |
|                                                                |                           | Condiment               | Leaves                       | Cooked with the<br>meal                                                                                                                             |
| <i>Baccharis salicifolia</i><br>(Ruiz & Pav.) Pers., MG<br>416 | Jara o jarilla            | Stomach ache            | Leaves                       | Chewed                                                                                                                                              |
|                                                                |                           | Household<br>woods      | Dried stems<br>and branches  | To make brooms                                                                                                                                      |
|                                                                |                           | Smelly feet             | Leaves                       | Raw, put them<br>inside shoes                                                                                                                       |
| <i>Chrysactinia mexicana</i><br>A. Gray, MG 345                | Hierba de San<br>Nicolás  | Aphrodisiac             | Branches                     | Boile, drink as<br>tea, one cup for<br>nine consecutive<br>days                                                                                     |
|                                                                |                           | Fertility (mean         | Branches                     | Boiled, drink as                                                                                                                                    |

|                                                     |                          |                  |                     |                                                                                                                                                                                                                        |
|-----------------------------------------------------|--------------------------|------------------|---------------------|------------------------------------------------------------------------------------------------------------------------------------------------------------------------------------------------------------------------|
|                                                     |                          | and women)       |                     | tea                                                                                                                                                                                                                    |
|                                                     |                          | Menstrual cramps | Leaves and branches | Boiled, drink as tea                                                                                                                                                                                                   |
| <i>Dahlia pinnata</i> Cav., MG 474                  | Dalia                    | Ornamental       | Complete plant      | Planted in gardens                                                                                                                                                                                                     |
| <i>Dyssodia acerosa</i> DC., MG 475                 | Hierba del zorrilo       | Cough            | Leaves              | Boiled, six to seven leaves, drink as tea                                                                                                                                                                              |
| <i>Dyssodia setifolia</i> (Lag.) B. L. Rob., MG 476 | Parraleña                | Diarrhea         | Leaves              | Boiled, drink as tea                                                                                                                                                                                                   |
| <i>Echinacea angustifolia</i> DC., MG 344           | Quina, equina, equinácea | Anemia           | Leaves              | Boiled, drink as tea                                                                                                                                                                                                   |
|                                                     |                          | Antibiotic       | Leaves              | Boiled, drink as tea                                                                                                                                                                                                   |
|                                                     |                          | Flu              | Leaves              | Boiled, mixed with <i>Melissa officinalis</i> and <i>Cymbopogon citratus</i> leaves, drink as tea                                                                                                                      |
|                                                     |                          | Beverage         | Leaves              | Boiled, drink as tea                                                                                                                                                                                                   |
|                                                     |                          | Ornamental       | Complete plant      | Planted in gardens                                                                                                                                                                                                     |
| <i>Flourensia cernua</i> DC., MG 371                | Hojasé                   | Intestinal colic | Leaves              | Boiled, six to seven leaves, drink as tea                                                                                                                                                                              |
|                                                     |                          | Colic cramps     | Leaves              | Boiled, six to seven leaves, drink as tea                                                                                                                                                                              |
|                                                     |                          | Constipation     | Leaves              | Ground and toasted, six to seven leaves for two cups, mixed with honey bee and avocado leaves, drink as tea or, also, add a tablespoon of baking soda, drink it during three days along with a roasted chicken gizzard |

|                                                              |                                       |                           |                     |                                                                                                                                                             |
|--------------------------------------------------------------|---------------------------------------|---------------------------|---------------------|-------------------------------------------------------------------------------------------------------------------------------------------------------------|
|                                                              |                                       | Diarrhea                  | Leaves              | Boiled, six to seven leaves, drink as tea                                                                                                                   |
|                                                              |                                       | Stomach infection         | Leaves              | Boiled, six to seven leaves, drink as tea                                                                                                                   |
|                                                              |                                       |                           |                     |                                                                                                                                                             |
| <i>Helianthus annuus</i> L.,<br>MG 477                       | Girasol                               | Forage                    | Complete dry plant  | Raw                                                                                                                                                         |
|                                                              |                                       | Ornamental                | Complete plant      | Planted in gardens                                                                                                                                          |
| <i>Gnaphalium canescens</i> DC., MG 416                      | Gordolobo                             | Bronchitis, expectorant   | Flowers             | Boiled, mixed with <i>Eucalyptus</i> leaves and honey bee                                                                                                   |
| <i>Gutierrezia sarothrae</i> (Pursh) Britton & Rusby, MG 479 | Escoba de cambray or escoba de rosita | Household goods           | Dried branches      | To make brooms                                                                                                                                              |
| <i>Matricaria recutita</i> L., MG 417                        |                                       | Menstrual cramps          | Leaves and branches | Boiled, drink as tea                                                                                                                                        |
|                                                              |                                       | Intestinal colic          | Leaves and branches | Boiled, drink as tea                                                                                                                                        |
|                                                              |                                       | Constipation (children)   | Leaves and branches | Boiled, drink as tea                                                                                                                                        |
|                                                              |                                       | Conjunctivitis, cataracts | Leaves              | Boiled, put eye drops                                                                                                                                       |
|                                                              |                                       | Intestinal parasites      | Leaves and branches | Boiled, mixed with <i>Artemisia ludoviciana</i> , <i>Prunus armeniaca</i> , <i>Mentha piperita</i> and <i>Chenopodium ambrosioides</i> leaves, drink as tea |
|                                                              |                                       | Burp                      | Leaves and branches | Boiled, drink as tea                                                                                                                                        |
|                                                              |                                       | Respiratory diseases      | Leaves and branches | Boiled, drink as tea                                                                                                                                        |
|                                                              |                                       | Ceremonial                | Complete plants     | Bouquets                                                                                                                                                    |
|                                                              |                                       | Stomach pain              | Leaves              | Boiled, infusion                                                                                                                                            |

|                                                              |                 |                          |                    |                                  |
|--------------------------------------------------------------|-----------------|--------------------------|--------------------|----------------------------------|
|                                                              |                 | Bronchitis, expectorant  | Flowers            | Boiled, drink as tea             |
|                                                              |                 | Ornamental               | Complete plant     | Planted in gardens               |
|                                                              |                 | Condiment and savorizant | Leaves and flowers | Boiled, drink as tea             |
| <i>Milleria quinqueflora</i> L., MG 343                      | Cocolmeca       | Lose weight              | Dried root         | Boiled, drink the solution       |
| <i>Tanacetum parthenium</i> (L.) Sch.Bip. , MG 480           | Altamisa        | Stomach pain             | Leaves             | Boiled, infusion                 |
| <i>Taraxacum officinale</i> (L.) Weber ex F. H.Wigg., MG 494 | Diente de león  | Food                     | Leaves             | Raw or cooked                    |
|                                                              |                 | Anemia                   | Leaves             | Raw or cooked, also, as infusion |
|                                                              |                 | Diabetes                 | Leaves             | Cooked                           |
|                                                              |                 | Skin diseases            | Complete plant     | Ground, mixed with lemon, eat    |
|                                                              |                 | Vesicle                  | Leaves             | Boiled, drink the infusion       |
| <i>Tagetes lucida</i> (Sweet) Voss, MG 370                   | Yerbaníz        | Intestinal colic         | Complete plant     | Boiled, drink infusion           |
|                                                              |                 | Colic cramps             | Complete plant     | Boiled, drink infusion           |
|                                                              |                 | Constipation             | Complete plant     | Boiled, drink infusion           |
|                                                              |                 | Bracing                  | Complete plant     | Boiled, drink infusion           |
|                                                              |                 | Insect bites             | Complete plant     | Boiled, use as a poultice        |
|                                                              |                 | Condiment and savorizant | Leaves and flowers | Boiled                           |
|                                                              |                 | Chest pain               | Leaves             | Infusion                         |
|                                                              |                 | Cough                    | Leaves and flowers | Infusion                         |
|                                                              |                 | Beverage                 | Leaves and flowers | Boiled, drink as tea             |
|                                                              |                 | Stomach pain             | Leaves             | Boiled, infusion                 |
| <i>Tanacetum vulgare</i> L., MG 359                          | Tanaceto        | Ornamental               | Complete plant     | Planted in gardens               |
|                                                              |                 | Migraine                 | Leaves             | Boiled, drink as tea             |
| <i>Tanacetum parthenium</i>                                  | Geranio de olor | Chest pain               | Leaves             | Boiled, drink as                 |

|                                                                          |            |                         |                        |                                                  |
|--------------------------------------------------------------------------|------------|-------------------------|------------------------|--------------------------------------------------|
| (L.) Sch.Bip., MG 342                                                    |            |                         |                        | tea                                              |
| <i>Trixis californica</i><br>Kellogg var. <i>californica</i> ,<br>MG 369 | Árnica     | Stomach ulcers          | Flowers                | Boiled, as<br>infusion                           |
|                                                                          |            | Against cancer          | Flowers                | Boiled, as<br>infusión                           |
|                                                                          |            | Inflammation            | Flowers                | Boiled, as<br>infusion                           |
|                                                                          |            | Acne                    | Leaves and<br>flowers  | Boiled, use as<br>poultice (alcohol<br>or water) |
|                                                                          |            | Arthritis               | Leaves                 | Boiled, as<br>poultice                           |
|                                                                          |            | Veterinary              | Leaves and<br>flowers  | Ground and<br>boiled, as infusión                |
|                                                                          |            | Ornamental              | Complete<br>plants     | Planted in the<br>gardens, beautiful<br>flowers  |
|                                                                          |            | High pressure           | Leaves and<br>flowers  | Boiled, drink as<br>tea                          |
|                                                                          |            | Intestinal colic        | Complete<br>plant      | Boiled, drink as<br>infusion                     |
|                                                                          |            | Colic cramps            | Complete<br>plant      | Boiled, drink as<br>infusion                     |
|                                                                          |            | Constipation            | Complete<br>plant      | Boiled, drink as<br>infusion                     |
|                                                                          |            | High fever              | Leaves                 | Boiled, drink as<br>infusion                     |
|                                                                          |            | Headache                | Flowers                | Boiled, drink as<br>infusion                     |
|                                                                          |            | Respiratory<br>diseases | Leaves and<br>branches | Boiled, drink as<br>tea                          |
| <i>Zinnia elegans</i> L., MG<br>368                                      | Cartulinas | Ornamental              | Complete<br>plants     | Planted in the<br>gardens, beautiful<br>flowers  |
| <b>BALSAMINACEAE</b>                                                     |            |                         |                        |                                                  |
| <i>Impatiens balsamina</i> L.,<br>MG 324                                 | Belén      | Ornamental              | Complete<br>plant      | Planted in the<br>gardens                        |
| <i>Impatiens walleriana</i><br>Hook.f., MG 367                           | Teresita   | Ornamental              | Complete<br>plant      | Planted in gardens                               |
| <b>BEGONIACEAE</b>                                                       |            |                         |                        |                                                  |
| <i>Begonia uniflora</i> S.                                               | Begonia    | Ornamental              | Complete               | Planted in gardens                               |

|                                                                   |                      |                                       |                     |                                                    |
|-------------------------------------------------------------------|----------------------|---------------------------------------|---------------------|----------------------------------------------------|
| Watson, MG 366                                                    |                      |                                       | plant               |                                                    |
| <b>BIGNONIACEAE</b>                                               |                      |                                       |                     |                                                    |
| <i>Chilopsis linearis</i> (Cav.)<br>Sweet, MG 495                 | Mimbres              | Ornamental                            | Complete plant      | Planted in gardens                                 |
| <i>Tecoma stans</i> (L.) Juss.<br>ex Kunth, MG 323                | Tronadora, San Pedro | High pressure                         | Leaves and flowers  | Boiled, drink as tea                               |
|                                                                   |                      | Diabetes                              | Leaves and flowers  | Toasted, eat                                       |
|                                                                   |                      | Ornamental                            | Complete plant      | Planted in gardens                                 |
| <b>BORGINACEAE</b>                                                |                      |                                       |                     |                                                    |
| <i>Borago officinalis</i> L.,<br>MG 360                           | Borraja              | High fever                            | Leaves              | Infusion                                           |
|                                                                   |                      | Measles                               | Leaves              | Infusion; taking a bath with the solution          |
|                                                                   |                      | Variocella                            | Leaves and branches | Infusion and poultice                              |
|                                                                   |                      | Remove phlegm                         | Leaves              | Tea                                                |
| <i>Cordia boissieri</i> A.DC.,<br>MG 365                          | Anacahuita           | Respiratory diseases                  | Leaves and fruits   | Mixed and boiled                                   |
|                                                                   |                      | Tosferina                             | Flowers and fruits  | Mixed and boiled, take in the morning and evenings |
|                                                                   |                      | Forage                                | Fruits              | Raw                                                |
|                                                                   |                      | Timber and fuel                       | Stems and branches  | Dried                                              |
| <i>Ehretia anacua</i> (Terán & Berland.) I. M. Johnst.,<br>MG 322 | Anacua               | Bunions and dewclaws                  | Leaves              | Boiled, as poultice                                |
|                                                                   |                      | Food                                  | Fruits              | Raw or cook                                        |
|                                                                   |                      | Timber, living fences, household good | Wood                | Dried, planted.                                    |
|                                                                   |                      | Forage                                | Fruits              | Raw                                                |
| <i>Tiquilia canescens</i> (A. DC.) A. T. Richardson,<br>MG 496    | Ventósidad           | Colic                                 | Leaves              | Boiled, drink as tea                               |
|                                                                   |                      | Forage                                | Complete plant      | Raw                                                |

|                                                                                 |                   |                        |                |                                                                                  |
|---------------------------------------------------------------------------------|-------------------|------------------------|----------------|----------------------------------------------------------------------------------|
| <b>BRASSICACEAE</b>                                                             |                   |                        |                |                                                                                  |
| <i>Lepidium virginicum</i> L., MG 355                                           | Hierba del pájaro | Cicatrizant            | Leaves         | Ground, spread in the affected area                                              |
| <i>Raphanus sativus</i> L., MG 361                                              | Rábano            | Gallblader             | Root           | Raw or boiled, mixed with <i>Taraxacum officinale</i> leaves                     |
| <i>Rorippa nasturtium-aquaticum</i> (L.) Hayek, MG 497                          | Berro             | Food                   | Leaves         | Raw or cooked                                                                    |
|                                                                                 |                   | Anemia                 | Leaves         | Raw or infusion                                                                  |
|                                                                                 |                   | Hepatitis              | Leaves         | Chewed or infusion                                                               |
| <i>Sisymbrium irio</i> L., MG 354                                               | Mostaza           | Laxative               | Leaves         | Chewed                                                                           |
|                                                                                 |                   | Headache               | Leaves         | Spread fat on leaves and stick them in occipital                                 |
| <b>BROMELIACEAE</b>                                                             |                   |                        |                |                                                                                  |
| <i>Ananas comosus</i> (L.) Merr., MG 364                                        | Piña              | Food                   | Infrutescence  | Raw                                                                              |
| <i>Hechtia scariosa</i> L.B.Sm., MG 498                                         | Guapilla          | Fibers                 | Leaves         | Scraped, fibers to make cords                                                    |
|                                                                                 |                   | Lice control           | Leaves         | Toasted, ground, the ash resultant is smeared all over the head                  |
| <i>Tillandsia bartramii</i> Elliott, MG 331                                     | Muérdago, paistle | Cictarizant            | Leaves         | Dried, ground, spread over the affected area                                     |
|                                                                                 |                   | Ornamental             | Complete plant | In Christmas tree                                                                |
| <b>BUDDLEJACEAE</b>                                                             |                   |                        |                |                                                                                  |
| <i>Buddleja cordata</i> subsp. <i>tomentella</i> (Standl.) E. M. Norman, MG 330 | Tepozán           | Diabetes               | Branches       | Groun, boiled, driank as tea                                                     |
|                                                                                 |                   | Remove ingrow toenails | Leaves         | Boiled, as poultice over the affected area                                       |
|                                                                                 |                   | Smelly feet            | Leaves         | Boiled, mixed with <i>Trixis californica</i> leaves, wash feet with the solution |

|                                                       |                  |               |                  |                                                                                                                                                                                                                                             |
|-------------------------------------------------------|------------------|---------------|------------------|---------------------------------------------------------------------------------------------------------------------------------------------------------------------------------------------------------------------------------------------|
|                                                       |                  | Headache      | Flowers          | Ground, the pulp applied directly on the occipital                                                                                                                                                                                          |
|                                                       |                  |               |                  |                                                                                                                                                                                                                                             |
| CACTACEAE                                             |                  |               |                  |                                                                                                                                                                                                                                             |
| <i>Ariocarpus scaphirostris</i> Boed., MG 362         | Cresta de gallos | Rheumatism    | Complete plant   | In alcohol, as poultice                                                                                                                                                                                                                     |
| <i>Aztekium ritteri</i> (Boed.) Boed., MG 354         | Falso peyote     | Arthritis     | Complete plant   | In alcohol, wait for nine months before use, then mix with garlic cloves, <i>Ruta chalepensis</i> , <i>Agave echuguilla</i> root, <i>Rosmarinus officinale</i> leaves, a quarter of avocado stone, applied as poultice in the affected area |
| <i>Echinocactus platyacanthus</i> Link & Otto, MG 363 | Biznaga burra    | Food          | Fruits           | “Cabuches”, cooked, boiled with sugar to make candies                                                                                                                                                                                       |
|                                                       |                  | Living fences | Stems            | Planted in the gardens                                                                                                                                                                                                                      |
|                                                       |                  | Ornamental    | Complete plants  | Planted in the gardens                                                                                                                                                                                                                      |
|                                                       |                  | Forage        | Stems            | For goats, raw without spines                                                                                                                                                                                                               |
| <i>Echinocereus enneacanthus</i> Engelm., MG 418      | Alicoches        | Sore tonsils  | Fruits and stems | Toasted and placed as a poultice on the affected part                                                                                                                                                                                       |
|                                                       |                  | Veterinary    | Stems            | The spines are removed, toasted and put on the legs broken as a substitute for plaster, bandage the leg                                                                                                                                     |
| <i>Echinocereus poselgeri</i> Lem., MG 329            | Sacasil          | Burns         | Root             | Ground, as poultice in the                                                                                                                                                                                                                  |

|                                                                           |                   |                  |                |                                                                                          |
|---------------------------------------------------------------------------|-------------------|------------------|----------------|------------------------------------------------------------------------------------------|
|                                                                           |                   |                  |                | affected area                                                                            |
|                                                                           |                   | Cicatrizant      | Root           | Ground, as poultice in the affected area                                                 |
|                                                                           |                   | Veterinary       | Root           | Ground, as poultice, put on the legs broken as a substitute for plaster, bandage the leg |
|                                                                           |                   | Skin wounds      | Root           | Ground, mixed with soap, as poultice in the affected area                                |
| <i>Ferocactus pilosus</i><br>(Galeotti ex Salm-Dyck)<br>Werderm. , MG 363 | Biznaga roja      | Food             | Stems          | Cooked                                                                                   |
|                                                                           |                   | To quench thirst | Fruits         | Raw                                                                                      |
|                                                                           |                   | Ornamental       | Complete plant | Planted in the gardens                                                                   |
| <i>Marginatocereus marginatus</i> (DC.)<br>Backeb., MG 419                | Órgano            | Food             | Fruits         | Raw or cooked                                                                            |
|                                                                           |                   | Living fences    | Complete plant | Planted in gardens                                                                       |
|                                                                           |                   | Ornamental       | Complete plant | Planted in gardens                                                                       |
| <i>Opuntia ficus-indica</i> (L.)<br>Mill., MG 328                         | Nopal de castilla | Food             | Cladodes       | Raw or cooked                                                                            |
|                                                                           |                   | Diabetes         | Cladodes       | Liquefied, raw                                                                           |
|                                                                           |                   | Cholesterol      | Cladodes       | Liquefied, raw                                                                           |
|                                                                           |                   | Living fences    | Complete plant | Planted in gardens                                                                       |
|                                                                           |                   | Forage           | Complete plant | Cut into pieces                                                                          |
|                                                                           |                   | Ornamental       | Complete plant | Planted in gardens                                                                       |
|                                                                           |                   | Laxative         | Cladodes       | Liquefied, raw                                                                           |
|                                                                           |                   | Lose weight      | Cladodes       | Liquefied, raw                                                                           |
| <i>Opuntia imbricata</i><br>(Haw.) DC., MG 353                            | Coyonoxtle        | Veterinary       | Stems pulp     | Raw or toasted, splinting broken limbs in humans                                         |

|                                                                  |                    |                           |                              |                                                          |
|------------------------------------------------------------------|--------------------|---------------------------|------------------------------|----------------------------------------------------------|
|                                                                  |                    |                           |                              | or animals                                               |
|                                                                  |                    | Inflamed tonsils          | Fruit                        | Raw, ground, apply the pulp over the affected area       |
| <i>Opuntia leptocaulis</i> DC.                                   | Tasajillo          | Food                      | Fruits                       | Raw or cooked                                            |
| <i>Opuntia lindheimeri</i> Engelm., MG 258                       | Nopal serrano      | Veterinary (broken limbs) | Cladodes pulp                | Applied as poultice, splint and bandage the broken leg   |
|                                                                  |                    | Retention                 | Root                         | Boiled, drink the solution                               |
|                                                                  |                    | Forage                    | Cladodes, flowers and fruits | Raw, cut into pieces                                     |
|                                                                  | <i>Opuntia</i> sp. | Forage                    | Complete plant               | Raw, cut into pieces                                     |
| CANNACEAE                                                        |                    |                           |                              |                                                          |
| <i>Canna indica</i> L., MG 364                                   | Coyol              | Sunny                     | Root                         | Ground, spread over the entire head (people/animals)     |
|                                                                  |                    | Ornamental                | Complete plant               | Planted in gardens                                       |
| CARICACEAE                                                       |                    |                           |                              |                                                          |
| <i>Carica papaya</i> L., MG 499                                  | Papaya             | Food                      | Fruit                        | Raw                                                      |
| CAPRIFOLIACEAE                                                   |                    |                           |                              |                                                          |
| <i>Lonicera japonica</i> Thunb., MG 259                          | Madreselva         | Ornamental                | Complete plants              | Planted in gardens, beautiful flowers                    |
| <i>Sambucus candensis</i> var. <i>mexicana</i> C. Presl., MG 327 | Sauco              | Flu                       | Branches                     | Boiled, drink as tea                                     |
|                                                                  |                    | High fever                | Branches and leaves          | Boiled, drink as tea and also, take a bath with solution |
|                                                                  |                    | Cough                     | Flowers                      | Boiled, drink as tea                                     |
|                                                                  |                    | Toothache                 | Leaves                       | Boiled in salt, gargle                                   |
| CARYOPHYLLACEAE                                                  |                    |                           |                              |                                                          |
| <i>Dianthus deltoides</i> L.,                                    | Clavelinas         | Ornamental                | Complete                     | Planted in gardens                                       |

|                                                   |                            |                         |                              |                                                                                                                                                                                                                      |
|---------------------------------------------------|----------------------------|-------------------------|------------------------------|----------------------------------------------------------------------------------------------------------------------------------------------------------------------------------------------------------------------|
| MG 420                                            |                            |                         | plant                        |                                                                                                                                                                                                                      |
| CHENOPODIACEAE                                    |                            |                         |                              |                                                                                                                                                                                                                      |
| <i>Beta vulgaris</i> L., MG 341                   | Acelgas                    | Food                    | Leaves                       | Cook or raw                                                                                                                                                                                                          |
|                                                   |                            | Medicinal               | Leaves                       | Infusion (anemia);<br>cook (diabetes<br>and blood<br>pressure)                                                                                                                                                       |
| <i>Chenopodium<br/>ambrosioides</i> L., MG<br>260 | Epazote                    | Intestinal<br>parasites | Leaves and<br>inflorescences | Boiled, mixed<br>with leaves of<br><i>Matricaria<br/>recutita</i> ,<br><i>Artemisia<br/>ludoviciana</i> ,<br><i>Prunus persica</i><br>and <i>Mentha<br/>piperita</i> , drink the<br>solution                         |
|                                                   |                            | Condiment               | Leaves                       | Mixed with<br>frijoles (beans)                                                                                                                                                                                       |
|                                                   |                            | Ceremonial              | Complete<br>plant            | Dried, placed at<br>the entrance of the<br>doors of the<br>houses                                                                                                                                                    |
| <i>Salsola tragus</i> L., MG<br>365               | Capitana                   | Wounds                  | Leaves and<br>stems          | Toasted, wash the<br>wound with the<br>solution                                                                                                                                                                      |
| COMMELINACEAE                                     |                            |                         |                              |                                                                                                                                                                                                                      |
| <i>Commelina coelestis</i><br>Willd., MG 352      | Hierba del<br>pollo        | Dermic<br>hemorrhages   | Leaves                       | Ground, applied<br>directly on the<br>affected area }                                                                                                                                                                |
| <i>Commelina dianthifolia</i><br>Delile, MG 326   | Hierba de la<br>golondrina | Kidney<br>diseases      | Complete<br>plant            | Boiled, mixed<br>with <i>Euphorbia<br/>glyptosperma</i><br>(leaves), <i>Zea<br/>mays</i> (styles),<br><i>Equisetum<br/>laevigatum</i><br>(stems), and<br><i>Mimosa<br/>malacophylla</i><br>(leaves), drink as<br>tea |
|                                                   |                            | Vomit                   | Branches                     | Boiled, drink the                                                                                                                                                                                                    |

|                                                           |                      |                    |                     |                                                           |
|-----------------------------------------------------------|----------------------|--------------------|---------------------|-----------------------------------------------------------|
|                                                           |                      |                    |                     | solution                                                  |
|                                                           |                      | Cicatrizate        | Leaves              | Crushed and mixed with cobweb, apply on the affected part |
| <i>Tradescantia pringlei</i> S. Watson, MG 340            | Hierba de la gallina | High temperature   | Leaves              | Boiled, drink the solution                                |
| CONVOLVULACEAE                                            |                      |                    |                     |                                                           |
| <i>Ipomoea batatas</i> (L.) Lam., MG 399                  | Camote               | Food               | Root                | Cooked                                                    |
| CANNABACEAE                                               |                      |                    |                     |                                                           |
| <i>Cannabis indica</i> Lam., (observed only)              | Marihuana            | Bruises            | Leaves and branches | In alcohol, as poultice                                   |
|                                                           |                      | Joint pain         | Leaves and branches | In alcohol, as poultice                                   |
|                                                           |                      | Migraine           | Leaves and branches | In alcohol, as poultice                                   |
|                                                           |                      | Reumatism          | Leaves and branches | In alcohol, as poultice                                   |
| CRASSULACEAE                                              |                      |                    |                     |                                                           |
| <i>Echeveria strictiflora</i> A.Gray, MG 325              | Siempreviva          | Conjunctivitis     | Leaves              | Sap as a substitute for eye drops                         |
|                                                           |                      | Ornamental         | Complete plant      | Planted in pots                                           |
| <i>Sedum diffusum</i> S. Watson, MG 260                   | Chisme               | Heart palpitations | Leaves              | Raw, ground, chew                                         |
| CUCURBITACEAE                                             |                      |                    |                     |                                                           |
| <i>Citrullus lanatus</i> (Thunb.) Matsum. & Nakai, MG 350 | Sandía               | Food               | Fruit               | Raw                                                       |
| <i>Cucumis melo</i> L.                                    | Melón                | Food               | Fruits              | Raw                                                       |
| <i>Cucurbita ficifolia</i> Bouché, MG 398                 | Chilacayote          | Food               | Fruit               | Cooked or raw                                             |
|                                                           |                      | Wounds             | Fruit               | Toasted, apply the pulp directly in the affected part     |
| <i>Cucurbita foetidissima</i> Kunth, MG 261               | Calabacilla loca     | Wash hair          | Fruit and leaves    | As a soap substitute, ground and in water                 |
|                                                           |                      | Wash dishes        | Fruit and leaves    | As a soap substitute, ground                              |

|                                                                  |                      |                            |                          |                                                                                                             |
|------------------------------------------------------------------|----------------------|----------------------------|--------------------------|-------------------------------------------------------------------------------------------------------------|
|                                                                  |                      |                            |                          | and in water                                                                                                |
|                                                                  |                      | Vaginal<br>cleansing       | Fruit (mature)           | Raw, put over the<br>vagina after<br>giving birth                                                           |
| <i>Cucurbita moschata</i><br>Duchesne, MG 366                    | Calabaza             | Food                       | Flower; fruits;<br>seeds | Cooked; cooked;<br>raw (dried)                                                                              |
|                                                                  |                      | Diabetes                   | Leaves and<br>fruits     | Cooked, mixed<br>with nopales<br>( <i>Opuntia</i> spp.)                                                     |
| <i>Lagenaria siceraria</i><br>(Molina) Standl., MG 324           | Guaje or Huaje       | Extract sap                | Dried fruits             | Cut at both ends,<br>suction <i>Agave</i> sap                                                               |
|                                                                  |                      | Store water                | Dried fruits             | As a substitute<br>canteen                                                                                  |
| CUPRESSACEAE                                                     |                      |                            |                          |                                                                                                             |
| <i>Juniperus deppeana</i> var.<br><i>deppeana</i> Steud., MG 397 | Táscate              | Timber and<br>construction | Logs                     | Dried                                                                                                       |
|                                                                  |                      | Ornamental                 | Complete<br>plant        | Planted in the<br>gardens                                                                                   |
| <i>Taxodium mucronatum</i><br>Ten., MG 262                       | Sabino               | Construction               | Wood                     | Dried, logs                                                                                                 |
| EQUISETACEAE                                                     |                      |                            |                          |                                                                                                             |
| <i>Equisetum laevigatum</i> A.<br>Braun, MG 323                  | Cola de caballo      | Cancer                     | Leaves                   | Boiled, drink the<br>solution                                                                               |
|                                                                  |                      | Prostate                   | Stems                    | Mixed with corn<br>flower styles,<br>boiled, drink the<br>solution                                          |
|                                                                  |                      | Kidney stones              | Stems                    | Mixed with dried<br>stem pieces of<br><i>Eysenhardtia</i><br><i>texana</i> , boil and<br>drink the solution |
| ERICACEAE                                                        |                      |                            |                          |                                                                                                             |
| <i>Arbutus xalapensis</i><br>Kunth, MG 262                       | Madroño              | Food                       | Fruits                   | Raw                                                                                                         |
|                                                                  |                      | Timber                     | Wood                     | Dried, in pieces                                                                                            |
| EUPHORBIACEAE                                                    |                      |                            |                          |                                                                                                             |
| <i>Acalypha hederacea</i><br>Torr., MG 367                       | Hierba del<br>cáncer | Anticancer                 | Branches                 | Boiled, drink as<br>tea                                                                                     |
|                                                                  |                      | Gastritis                  | Leaves and<br>branches   | Boiled, drink as<br>tea                                                                                     |

|                                                          |                         |                                        |                  |                                                                                                                  |
|----------------------------------------------------------|-------------------------|----------------------------------------|------------------|------------------------------------------------------------------------------------------------------------------|
|                                                          |                         | Cough                                  |                  | Boiled, drink as tea                                                                                             |
|                                                          |                         | Nosebleed                              | Branches         | Boiled, inhale vapors arising boiled leaves                                                                      |
|                                                          |                         | Wounds                                 |                  | Boiled, as poultice                                                                                              |
| <i>Bernardia myricifolia</i> (Scheele) S. Watson, MG 368 | Oreja de ratón          | Diabetes                               | Leaves           | Boiled, mixed with <i>Zea mays</i> styles and <i>Equisetum laevigatum</i> stems, drink as tea                    |
| <i>Cnidoscolus chayamansa</i> McVaugh, MG 421            | Chaya                   | Diabetes                               | Leaves           | Boiled, drink the solution                                                                                       |
|                                                          |                         | Food                                   | Leaves           | Raw or boiled, to make salads                                                                                    |
| <i>Croton suaveolens</i> Torr., MG 396                   | Salvia                  | Amenorrhea                             | Stems and leaves | Boiled, drink as tea                                                                                             |
|                                                          |                         | Anemia                                 | Stems and leaves | Boiled, drink as tea                                                                                             |
|                                                          |                         | Stomach disorders                      | Stems and leaves | Boiled, drink as tea                                                                                             |
|                                                          |                         | Purify the blood                       | Stems and leaves | Boiled, drink as tea                                                                                             |
|                                                          |                         | Bad breath                             | Stems and leaves | Boiled, drink as tea                                                                                             |
| <i>Euphorbia antisiphilitica</i> Zucc., MG 322           | Candelilla              | Veterinary (shed remnants of placenta) | Sap              | Stems boiled (give drink to the animal a liter of the solution)                                                  |
|                                                          |                         | Toothache                              | Stems            | Boiled, swished around the mouth                                                                                 |
|                                                          |                         | Protect grafts                         | Wax              | Melted wax is spread on the graft union                                                                          |
| <i>Euphorbia glyptosperma</i> Engelm., MG 321            | Hierba de la golondrina | Kidney stones                          | Leaves           | Boiled, mixed with <i>Commelian dianthifolia</i> (leaves), <i>Zea mays</i> (styles), <i>Equisetum laevigatum</i> |

|                                                         |                 |                               |                     |                                                                       |
|---------------------------------------------------------|-----------------|-------------------------------|---------------------|-----------------------------------------------------------------------|
|                                                         |                 |                               |                     | (stems), and <i>Mimosa malacophylla</i> (leaves), drink as tea        |
|                                                         |                 | Hair loss                     | Root                | Crushed, applied directly to the head                                 |
|                                                         |                 | Gingivitis                    | Root                | Boiled, applied directly over the gums, and drink the solution as tea |
| <i>Euphorbia pulcherrima</i> Willd. ex Klotzsch, MG 320 | Noche buena     | Ornamental                    | Complete plant      | Planted in gardens                                                    |
| <i>Jatropha dioica</i> Sessé, MG422                     | Sangre de drago | Urinary tract clean           | Dried branches      | Boiled, drink the solution                                            |
|                                                         |                 | Prostate                      | Dried branches      | Boiled, drink the solution                                            |
|                                                         |                 | Avoid falling of teeth        | Root                | Chewed                                                                |
|                                                         |                 | Cuts, grains, petty and warts | Sap                 | Spread the sap in the affected area                                   |
| <i>Tragia nepetifolia</i> Cav., MG 263                  | Ortiguilla      | Neutralize toxins (Ivy)       | Leaves              | Macerated, boiled, take a bath with the solution                      |
|                                                         |                 | Good blood circulation        | Leaves              | Boiled, drink as tea                                                  |
|                                                         |                 | Ceremonial                    | Complete plant      | To purify the soul and remove the frighten                            |
| FABACEAE                                                |                 |                               |                     |                                                                       |
| <i>Acacia amentacea</i> DC., MG 395                     | Chaparro prieto | Amoebiasis                    | Branches and leaves | Boiled, drink the infusion                                            |
|                                                         |                 | Gum diseases                  | Bark and branches   | Swished around the mouth                                              |
|                                                         |                 | Shiny hair                    | Leaves and bark     | Boiled, use as shampoo                                                |
|                                                         |                 | Household goods               | Wood                | Dried                                                                 |
|                                                         |                 | Fuel                          | Complete plant      | Dried                                                                 |
|                                                         |                 | Ornamental                    | Complete plant      | Planted in thegardens                                                 |

|                                                                       |                                |                         |                                       |                                                                                              |
|-----------------------------------------------------------------------|--------------------------------|-------------------------|---------------------------------------|----------------------------------------------------------------------------------------------|
| <i>Acacia berlandieri</i><br>Benth., MG 423                           | Guajillo, sacuta               | Forage                  | Leaves, buds<br>and young<br>branches | Raw                                                                                          |
|                                                                       |                                | Intestinal<br>parasites | Branches                              | Pieces, dried,<br>boiled, drink the<br>solution                                              |
| <i>Acacia farnesiana</i> (L.)<br>Willd., MG 272                       | Huizache                       | Inflammation            | Bark (ground)<br>and leaves           | Boiled, mixed<br>with <i>Agave<br/>bracteosa</i> root<br>(ground and<br>dried), drink as tea |
|                                                                       |                                | External shocks         | Bark (ground)<br>and leaves           | Boiled, mixed<br>with <i>Agave<br/>bracteosa</i> root<br>(ground and<br>dried), drink as tea |
|                                                                       |                                | Forage                  | Leaves and<br>fruits                  | Raw                                                                                          |
|                                                                       |                                | Construction            | Wood                                  | Dry, in pieces                                                                               |
| <i>Arachis hypogaea</i> L.,<br>MG 501                                 | Cacahuete                      | Food                    | Fruit                                 | Raw, toasted                                                                                 |
| <i>Astragalus sanguineus</i><br>Rydb., MG 508                         | Garbancillo                    | Ornamental              | Complete<br>plant                     | Planted in gardens                                                                           |
| <i>Caesalpinia mexicana</i> A.<br>Gray, MG 265                        | Hierba del<br>potro            | Tootache                | Leaves                                | Ground and<br>boiled, swished<br>around the mouth                                            |
| <i>Bauhinia purpurea</i> L.,<br>MG 424                                | Pata de vaca                   | Ornamental              | Complete<br>plant                     | Planted in gardens                                                                           |
| <i>Havardia pallens</i><br>(Benth.) Britton & Rose,<br>MG 264, MG 319 | Tenaza                         | Timber                  | Wood                                  | Logs                                                                                         |
|                                                                       |                                | Construction            | Wood                                  | Dry pieces                                                                                   |
|                                                                       |                                | Forage                  | Leaves                                | Raw                                                                                          |
|                                                                       |                                | Household<br>goods      | Wood                                  | Dry (hoe handles)                                                                            |
|                                                                       |                                | Fences                  | Wood                                  | Dry branches                                                                                 |
|                                                                       |                                | Charcoal                | Wood                                  | To cook food                                                                                 |
| <i>Medicago sativa</i> L., MG<br>394                                  | Alfalfa                        | Forage                  | All plant                             | Dry, raw                                                                                     |
| <i>Eysenhardtia texana</i><br>Scheele, MG 512                         | Vara dulce,<br>palo azul, vara | Purify the<br>blood     | Wood (small<br>pieces)                | Dry pieces in<br>water for three                                                             |

|                                            |                       |                 |                     |                                                                                                             |
|--------------------------------------------|-----------------------|-----------------|---------------------|-------------------------------------------------------------------------------------------------------------|
|                                            | azul                  |                 |                     | days, not boil, use the solution as daily, drink it for four consecutive days                               |
|                                            |                       | Diabetes        | Wood (small pieces) | Dry pieces in water for three days, not boil, use the solution as daily, drink it for four consecutive days |
|                                            |                       | Kidney diseases | Wood (small pieces) | Dry pieces in water for three days, not boil, use the solution as daily, drink it for four consecutive days |
|                                            |                       | Varicella       | Wood (small pieces) | Dry pieces in water for three days, not boil, use the solution as daily, drink it for four consecutive days |
|                                            |                       | Gallblader      | Wood (small pieces) | Dry pieces in water for three days, not boil, use the solution as daily, drink it for four consecutive days |
| <i>Mimosa malacophylla</i> A. Gray, MG 318 | Charrasquilla         | Kidney diseases | Root                | Boiled, drink the solution                                                                                  |
|                                            |                       | Backpains       | Root                | Boiled, drink the solution                                                                                  |
|                                            |                       | Mumps           | Fruits              | Toasted, apply directly to the affected area                                                                |
| <i>Mimosa pudica</i> L., MG 271            | Sensitiva, vergonzosa | Ornamental      | Complete plant      | Planted in Gardens                                                                                          |
| <i>Phaseolus vulgaris</i> L., MG 425       | Frijol                | Food            | Fruit               | Cooked                                                                                                      |

|                                                                                      |           |                  |                 |                                                                                     |
|--------------------------------------------------------------------------------------|-----------|------------------|-----------------|-------------------------------------------------------------------------------------|
|                                                                                      |           | Veterinary       | Immature fruits | Mixed with leaves of <i>Mentha piperita</i> , to shed the remnant of the placenta   |
| <i>Pithecellobium dulce</i> (Roxb.) Benth., MG 317                                   | Guamuchil | Flu              | Leaves          | Boiled, drink as tea                                                                |
| <i>Prosopis glandulosa</i> var. <i>torreyana</i> (L. D.Benson) M. C. Johnst., MG 267 | Mezquite  | Cataracts        | Leaves          | Ground, fermented in water, put eye drops                                           |
|                                                                                      |           | Timber, charcoal | Wood            | Dried                                                                               |
|                                                                                      |           | Living fences    | Complete plant  | Planted in the yard                                                                 |
|                                                                                      |           | Forage           | Fruits          | Dried, to feed pigs                                                                 |
|                                                                                      |           | Food             | Fruits          | Raw or cooked                                                                       |
|                                                                                      |           | Make chees       | Fruits          | Boiled with milk                                                                    |
|                                                                                      |           | Veterinary       | Resin           | Boiled, mixed with ground bark, spread and leg splints                              |
|                                                                                      |           | Ceremonial       | Wood            | Burned, the frightened person should smell the smoke, making a cross with the hands |
| FAGACEAE                                                                             |           |                  |                 |                                                                                     |
| <i>Quercus polymorpha</i> Schltdl. & Cham., MG 393                                   | Encino    | Forage           | Fruits          | Raw, for pigs mainly                                                                |
|                                                                                      |           | Food             | Fruits          | Ground and mixed with cornmeal, to make tortillas                                   |
|                                                                                      |           | Gingivitis       | Bark            | Ground, swish                                                                       |
|                                                                                      |           | Toothache        | Bark            | Ground, swish                                                                       |
|                                                                                      |           | Timber           | Wood            | In pieces                                                                           |
| <i>Quercus emoryi</i> Torr., MG 392                                                  | Encino    | Food             | Fruits          | Ground and mixed with                                                               |

|                                                       |                      |                            |                    |                                                           |
|-------------------------------------------------------|----------------------|----------------------------|--------------------|-----------------------------------------------------------|
|                                                       |                      |                            |                    | cornmeal, to make tortillas                               |
|                                                       |                      | Pyorrhea                   |                    | Ground, swish                                             |
|                                                       |                      | Gingivitis                 | Bark               | Ground, swish                                             |
|                                                       |                      | Toothache                  | Bark               | Ground, swish                                             |
|                                                       |                      | Timber                     | Wood               | In pieces                                                 |
| FOUQUIERIACEAE                                        |                      |                            |                    |                                                           |
| <i>Fouquieria splendens</i><br>Engelm., MG 426        | Ocotillo,<br>albarda | Tooth ache                 | Leaves             | Raw, chewed                                               |
|                                                       |                      | Colic                      | Leaves             | Raw, chewed                                               |
|                                                       |                      | Stomach ache               | Leaves             | Boiled, drink as tea                                      |
|                                                       |                      | Living fences              | Complete plant     | Planted in gardens                                        |
|                                                       |                      | Construction               | Dried branches     | To make animal pens                                       |
|                                                       |                      | Fuel                       | Complete plant     | Dried parts                                               |
|                                                       |                      | Forage                     | Leaves and flowers | Raw                                                       |
| GERANIACEAE                                           |                      |                            |                    |                                                           |
| <i>Pelargonium x hortorum</i><br>L.H. Bailey, MG 268  | Geranio              | Ornamental                 | Complete plant     | Planted in gardens, multicolor flowers                    |
|                                                       |                      | Burp                       | Leaves             | Boiled, drink as tea                                      |
|                                                       |                      | Stomach ache               | Leaves             | Boiled, mixed with leaves of <i>Litsea glauscecens</i>    |
|                                                       |                      | Constipation (suppository) | Petiole            | Lubricated with fat, anally inserted in children          |
|                                                       |                      | Inflammation               | Leaves             | Boiled, solution applied as poultice in the affected area |
| HYDRANGEACEAE                                         |                      |                            |                    |                                                           |
| <i>Hydrangea macrophylla</i><br>(Thunb.) Ser., MG 427 | Hortensia            | Ornamental                 | Complete plant     | Planted in gardens                                        |
| IRIDACEAE                                             |                      |                            |                    |                                                           |
| <i>Gladiolus grandiflorus</i><br>Andrews, MG 349      | Gladiola             | Ornamental                 | Complete plant     | Planted in gardens,                                       |

|                                                          |               |                                        |                    |                                                                                                                                                    |
|----------------------------------------------------------|---------------|----------------------------------------|--------------------|----------------------------------------------------------------------------------------------------------------------------------------------------|
|                                                          |               |                                        |                    | multicolor flowers                                                                                                                                 |
| JUGLANDACEAE                                             |               |                                        |                    |                                                                                                                                                    |
| <i>Carya illinoensis</i><br>(Wangenh.) K.Koch, MG<br>282 | Nogal         | Gingivitis                             | Leaves             | Boiled, drink as<br>tea                                                                                                                            |
|                                                          |               | Diuretic                               | Leaves             | Boiled, drink as<br>tea                                                                                                                            |
|                                                          |               | Lubricate joints                       | Leaves             | Boiled, drink as<br>tea                                                                                                                            |
|                                                          |               | Healthy heart                          | Leaves             | Boiled, drink as<br>tea                                                                                                                            |
|                                                          |               | Harden gums<br>(prevent tooth<br>fall) | Leaves and<br>bark | Boiled, leaves and<br>bark, drink as tea,<br>or also, chew the<br>bark                                                                             |
|                                                          |               | Anemia                                 | Leaves and<br>bark | Boiled, drink as<br>tea                                                                                                                            |
|                                                          |               | Constipation                           | Leaves             | Dry, ground,<br>mixed with<br>glycerine into a<br>paste, rub in the<br>stomach                                                                     |
|                                                          |               | Food                                   | Fruits             | Raw                                                                                                                                                |
|                                                          |               | Ceremonial                             | Leaves             | Smoked, to purify<br>the soul                                                                                                                      |
|                                                          |               | Construction                           | Wood               | Logs                                                                                                                                               |
|                                                          |               | Hair dye                               | Fruit peel         | Boiled, it turns<br>dark-brown or<br>almost black,<br>dyeing hair with<br>the solution                                                             |
| <i>Juglans mollis</i> Engelm.,<br>MG 269                 | Nogal criollo | Food                                   | Fruit              | Raw (pecan<br>halves)                                                                                                                              |
|                                                          |               | Anemia                                 | Leaves and<br>bark | Boiled, drink as<br>tea                                                                                                                            |
|                                                          |               | Healthy blood                          | Leaves and<br>bark | Boiled, drink as<br>tea                                                                                                                            |
|                                                          |               | Shampoo                                | Bark               | Ground, mixed<br>with <i>Agave</i><br><i>25echeguilla</i> root<br>, <i>Jatropha dioica</i><br>root, <i>Rosmarinus</i><br><i>officinale</i> leaves, |

|                                                   |                    |                  |                |                                                                                                                                                                                                                 |
|---------------------------------------------------|--------------------|------------------|----------------|-----------------------------------------------------------------------------------------------------------------------------------------------------------------------------------------------------------------|
|                                                   |                    |                  |                | <i>Aloe vera</i> pulp, <i>Equisetum laevigatum</i> stems (ground), <i>Melissa officinalis</i> leaves (ground), and <i>Carya illinoensis</i> bark, boil them together, strain the contents and use it as shampoo |
|                                                   |                    | Ceremonial       | Leaves         | Smoked, to purify the soul                                                                                                                                                                                      |
|                                                   |                    | Timber           | Wood           | Dry, in pieces                                                                                                                                                                                                  |
|                                                   |                    | Living fences    | Complete plant | Planted in gardens                                                                                                                                                                                              |
|                                                   |                    | Construction     | Wood           | Logs                                                                                                                                                                                                            |
|                                                   |                    | Fuel             | Wood           | Dry wood                                                                                                                                                                                                        |
|                                                   |                    | Ornamental       | Complete plant | Planted in gardens                                                                                                                                                                                              |
| LAMIACEAE                                         |                    |                  |                |                                                                                                                                                                                                                 |
| <i>Aloysia triphylla</i> (L'Hér.) Britton, MG 348 | Cedrón de Castilla | General pains    | Leaves         | Drink the solution                                                                                                                                                                                              |
|                                                   |                    | Hepatitis        | Leaves         | Boiled, drink as tea                                                                                                                                                                                            |
| <i>Hedeoma drummondii</i> Benth., MG 270          | Poleo              | Abortive         | Leaves         | Boiled, drink as tea                                                                                                                                                                                            |
|                                                   |                    | Intestinal colic | Leaves         | Boiled, drink as tea                                                                                                                                                                                            |
|                                                   |                    | Expectorant      | Leaves         | Boiled, drink as tea                                                                                                                                                                                            |
|                                                   |                    | Flatulences      | Leaves         | Boiled, drink as tea                                                                                                                                                                                            |
|                                                   |                    | Insomnia         | Leaves         | Boiled, drink as tea                                                                                                                                                                                            |
|                                                   |                    | Burp             | Leaves         | Boiled, drink as tea                                                                                                                                                                                            |
|                                                   |                    | Relaxing         | Leaves         | Boiled, drink as tea                                                                                                                                                                                            |
|                                                   |                    | Ceremonial       | Complete plant | Dried, bouquets, along with <i>Litsea glauscecens</i> and <i>Matricaria recutita</i> dried                                                                                                                      |

|                                             |                                      |                     |                            |                                                                                        |
|---------------------------------------------|--------------------------------------|---------------------|----------------------------|----------------------------------------------------------------------------------------|
|                                             |                                      |                     |                            | plants, and<br><i>Brahea dulcis</i><br>(leaves)                                        |
| <i>Majorana hortensis</i><br>Moench, MG 347 | Mejorana                             | Laxative            | Branches and<br>leaves     | Drink as tea                                                                           |
|                                             |                                      | Intestinal colic    | Branches and<br>leaves     | Drink as tea                                                                           |
|                                             |                                      | Condiment           | Leaves                     | Raw or cooked,<br>mixed with<br><i>Ocimum</i><br><i>basilicum</i> leaves               |
| <i>Marrubium vulgare</i> L.,<br>MG 316      | Marrubio,<br>manrrubio or<br>marruño | Amebiasis           | Branches and<br>leaves     | Boiled, drink as<br>tea                                                                |
|                                             |                                      | Lose weight         | Branches and<br>leaves     | Boiled, drink as<br>tea                                                                |
|                                             |                                      | High pressure       | Branches and<br>leaves     | Boiled, drink as<br>tea                                                                |
|                                             |                                      | Gallbladder<br>pain | Branches and<br>leaves     | Boiled, drink as<br>tea                                                                |
|                                             |                                      | Stomach ache        | Branches and<br>leaves     | Boiled, drink as<br>tea                                                                |
|                                             |                                      | Diabetes            | Branches and<br>leaves     | Boiled, drink as<br>tea                                                                |
|                                             |                                      | Nervousness         | Branches and<br>leaves     | Boiled, drink as<br>tea                                                                |
|                                             |                                      | Flu                 | Branches and<br>leaves     | Boiled, drink as<br>tea                                                                |
|                                             |                                      | Constipation        | Branches and<br>leaves     | Boiled, drink as<br>tea                                                                |
|                                             |                                      | Alopecia            | Branches and<br>leaves     | Boiled, spread<br>over the head                                                        |
|                                             |                                      | Ceremonial          | Complete<br>plant          | Bouquets                                                                               |
| <i>Melissa officinalis</i> L.,<br>MG 346    | Citronela,<br>toronjil               | Aroma               | Leaves                     | Add boiled leaves<br>to shampoo                                                        |
|                                             |                                      | Heartache           | Branches<br>(small pieces) | Boiled, drink as<br>tea                                                                |
|                                             |                                      | Stomach ache        | Leaves                     | Boiled, mixed<br>with leaves of<br><i>Ocimum</i><br><i>basilicum</i> , drink<br>as tea |
|                                             |                                      | Lice control        | Leaves                     | Mixed with bone                                                                        |

|                                                                                  |             |                      |                  |                                                                                                                                   |
|----------------------------------------------------------------------------------|-------------|----------------------|------------------|-----------------------------------------------------------------------------------------------------------------------------------|
|                                                                                  |             |                      |                  | mashed avocado, <i>Ruta chalepensis</i> and <i>Chenopodium ambrosioides</i> , leaves, boil and strain the mixture, use as shampoo |
| <i>Mentha x piperita</i> L., MG 315                                              | Hierbabuena | Intestinal colic     | Leaves           | Boiled, drink as tea                                                                                                              |
|                                                                                  |             | Constipation         | Leaves           | Boiled, drink as tea                                                                                                              |
|                                                                                  |             | Intestinal parasites | Leaves           | Boiled, drink as tea                                                                                                              |
|                                                                                  |             | Bad breath           | Leaves           | Chew the leaves                                                                                                                   |
|                                                                                  |             | Beverage             | Leaves           | Boiled, drink as tea                                                                                                              |
|                                                                                  |             | Ceremonial           | Complete plant   | Shaking the plant throughout the body                                                                                             |
|                                                                                  |             | Ornamental           | Complete plant   | Planted in gardens                                                                                                                |
|                                                                                  |             | Relaxing             | Leaves           | Boiled, drink as tea                                                                                                              |
|                                                                                  |             | High pressure        | Leaves           | Boiled, drink as tea                                                                                                              |
|                                                                                  |             | Headache             | Leaves           | Boiled, drink as tea                                                                                                              |
|                                                                                  |             | Laxative             | Leaves           | Boiled, drink as tea                                                                                                              |
|                                                                                  |             | Flatulences          | Leaves           | Boiled, drink as tea                                                                                                              |
|                                                                                  |             | Cough                | Leaves           | Boiled, mixed with honey bee and lemon leaves, drink as tea                                                                       |
|                                                                                  |             | Menstrual cramps     | Leaves           | Boiled, drink as tea                                                                                                              |
| <i>Monarda citriodora</i> var. <i>austromontana</i> (Epling) B. L.Turner, MG 390 | Betónica    | Urinary system       | Leaves           | Infusion                                                                                                                          |
|                                                                                  |             | Backache             | Leaves           | Infusion                                                                                                                          |
|                                                                                  |             | Menstrual cramps     | Leaves, branches | Infusion                                                                                                                          |
|                                                                                  |             | Eye infection        | Leaves           | Put eye drops                                                                                                                     |

|                                          |           |                      |                        |                                                             |
|------------------------------------------|-----------|----------------------|------------------------|-------------------------------------------------------------|
|                                          |           | Beverage             | Leaves                 | Drink, delicious taste                                      |
|                                          |           | Flatulences          | Leaves                 | Boiled, drink as tea                                        |
|                                          |           | Cough                | Leaves                 | Boiled, mixed with honey bee and lemon leaves, drink as tea |
|                                          |           | Ceremonial           | Complete plant         | Shaking the plant throughout the body                       |
|                                          |           | Ornamental           | Complete plant         | Planted in gardens                                          |
|                                          |           | Relaxing             | Leaves                 | Boiled, drink as tea                                        |
|                                          |           | Intestinal colic     | Leaves                 | Boiled, drink as tea                                        |
|                                          |           | Constipation         | Leaves                 | Boiled, drink as tea                                        |
|                                          |           | Intestinal parasites | Leaves                 | Boiled, drink as tea                                        |
|                                          |           | Bad breath           | Leaves                 | Chew the leaves                                             |
|                                          |           | Respiratory diseases | Leaves                 | Infusion                                                    |
| <i>Ocimum basilicum</i> L., MG 345       | Albahacar | Intestinal colic     | Leaves                 | Infusion                                                    |
|                                          |           | Respiratory diseases | Leaves                 | Infusion                                                    |
|                                          |           | Stomach pain         | Leaves                 | Infusion                                                    |
|                                          |           | Relaxing             | Leaves                 | Infusion                                                    |
|                                          |           | Cough                | Leaves                 | Infusion                                                    |
|                                          |           | Tachycardia          | Leaves                 | Infusion                                                    |
|                                          |           | Colitis              | Leaves                 | Infusion                                                    |
|                                          |           | Chest pain (heart)   | Leaves                 | Mixed with canela                                           |
|                                          |           | Remove bad luck      | Complete plant (dried) | Above of the main entrance door of the house                |
|                                          |           | Inflammation         | Leaves                 | Boiled, drink as tea                                        |
| <i>Rosmarinus officinalis</i> L., MG 314 | Romero    | Cicatrizant          | Branches and leaves    | Ground, applying on the affected part                       |

|  |  |                          |                     |                                                                             |
|--|--|--------------------------|---------------------|-----------------------------------------------------------------------------|
|  |  | Migraine                 | Leaves              | Boiled, drink as tea                                                        |
|  |  | Inflammation             | Leaves              | Boiled, drink as tea                                                        |
|  |  | Skin infections (grains) | Leaves and branches | Boiled, as poultice, applying directly on the affected area                 |
|  |  | Cough                    | Leaves              | Boiled, drink as tea                                                        |
|  |  | Beverage                 | Leaves              | Boiled, drink as tea                                                        |
|  |  | Insomnia                 | Leaves              | Boiled, drink as tea, and also, put dried leaves below pillow when sleeping |
|  |  | Colitis                  | Leaves              | Boiled, drink as tea                                                        |
|  |  | Dizziness                | Leaves              | Boiled, drink as tea                                                        |
|  |  | High pressure            | Leaves              | Boiled, drink as tea                                                        |
|  |  | Memory                   | Leaves              | Boiled, drink as tea                                                        |
|  |  | Colic                    | Leaves              | Boiled, drink as tea                                                        |
|  |  | Headache                 | Branches            | Ground, in water, gargle                                                    |
|  |  | Firming skin             | Branches and leaves | Boiled, wash the body with the solution                                     |
|  |  | Shocks                   | Branches and leaves | Boiled, as a poultice, applying in the affected area                        |
|  |  | Smelly feet              | Branches and leaves | Ground, put into the shoes                                                  |
|  |  | Shiny hair               | Leaves and branches | Ground, in water, wash the hair with the solution                           |
|  |  | Ceremonial               | Complete plant      | Purify the soul                                                             |

|                                            |         |                                |                         |                                                                    |
|--------------------------------------------|---------|--------------------------------|-------------------------|--------------------------------------------------------------------|
|                                            |         | Frighten                       | Complete plant          | Dried, pass the plant on the body                                  |
|                                            |         | Ornamental                     | Complete plant          | Planted in gardens                                                 |
|                                            |         |                                |                         |                                                                    |
| <i>Salvia microphylla</i><br>Kunth, MG 312 | Mirto   | Antibiotic (children)          | Complete plant          | Boiled, take a bath with solution                                  |
|                                            |         | Constipation (children)        | Leaves                  | Boiled, drink as tea                                               |
|                                            |         | Ceremonial (frighth)           | Complete plant          | Pass the plant on the body                                         |
|                                            |         | Ornamental                     | Complete plant          | Planted on gadrens                                                 |
| <i>Thymus vulgaris</i> L., MG 389          | Tomillo | Condiment                      | Leaves                  | Ground, raw                                                        |
|                                            |         | Expectorant                    | Branches (small pieces) | Boiled, drink as tea                                               |
| LAURACEAE                                  |         |                                |                         |                                                                    |
| <i>Cinnamomum verum</i> J. Presl., MG 388  | Canela  | Intestinal colic, colic cramps | Bark                    | Infusion                                                           |
|                                            |         | Condiment, flavoring           | Bark                    | Boiled                                                             |
| <i>Litsea glaucescens</i><br>Kunth, MG 428 | Laurel  | Chest pain                     | Leaves                  | Boiled, mixed with canela bark and orange peel, drink the solution |
|                                            |         | Bone pain                      | Leaves                  | Boiled, drink as tea                                               |
|                                            |         | Menstrual cramps               | Leaves                  | Boiled, drink as tea                                               |
|                                            |         | Stomach ache                   | Leaves                  | Boiled, drink as tea                                               |
|                                            |         | Flatulency                     | Leaves                  | Boiled, drink as tea                                               |
|                                            |         | Laxative                       | Leaves                  | Boiled, drink as tea                                               |
|                                            |         | Relaxing                       | Leaves                  | Boiled, drink as tea                                               |
|                                            |         | Reumatism                      | Leaves                  | Boiled, drink as tea                                               |
|                                            |         | Backache                       | Leaves                  | Boiled, drink as tea                                               |
|                                            |         | Condiment                      | leaves                  | Boiled                                                             |

|                                                                                      |          |                                  |                 |                                                                                                                   |
|--------------------------------------------------------------------------------------|----------|----------------------------------|-----------------|-------------------------------------------------------------------------------------------------------------------|
|                                                                                      |          | Ceremonial                       | Complete plant  | Bouquets, dried plants of laurel, <i>Hedeoma drummondii</i> , <i>Matricaria recutita</i> and <i>Brahea dulcis</i> |
|                                                                                      |          | Expectorant                      | Leaves          | Infusion                                                                                                          |
|                                                                                      |          | Cough                            | Leaves          | Infusion                                                                                                          |
|                                                                                      |          | High pressure                    | Leaves          | Boiled, drink as tea                                                                                              |
|                                                                                      |          | Relaxing                         | Leaves          | Infusion                                                                                                          |
| <i>Persea americana</i> var. <i>drymifolia</i> (Cham. & Schltl.) S. F. Blake, MG 344 | Aguacate | Respiratory diseases             | Leaves          | Infusion                                                                                                          |
|                                                                                      |          | Expectorant                      | Leaves          | Infusion                                                                                                          |
|                                                                                      |          | Cough                            | Leaves          | Infusion                                                                                                          |
|                                                                                      |          | Intestinal parasites             | Leaves          | Infusion                                                                                                          |
|                                                                                      |          | Amenorrhea                       | Leaves          | Infusion                                                                                                          |
|                                                                                      |          | Menstrual cramps                 | Leaves          | Infusion                                                                                                          |
|                                                                                      |          | Constipation                     | Leaves          | Infusion                                                                                                          |
|                                                                                      |          | Hernia                           | Leaves          | Infusion                                                                                                          |
|                                                                                      |          | Relaxing                         | Leaves          | Infusion                                                                                                          |
|                                                                                      |          | Bracing                          | Leaves          | Infusion mixed with milk                                                                                          |
|                                                                                      |          | Surfeit                          | Seed            | Ground                                                                                                            |
|                                                                                      |          | Food                             | Fruit           | Raw                                                                                                               |
| <i>Sassafras albidum</i> (Nutt.) Nees, MG 311                                        | Sasafrás | Anemia                           | Leaves          | Boiled, drink as tea                                                                                              |
|                                                                                      |          | Kidney diseases                  | Leaves and bark | Boiled, drink as tea                                                                                              |
|                                                                                      |          | Hardening of the skeletal system | Bark and leaves | Boiled, drink as tea                                                                                              |
|                                                                                      |          | Gallblader                       | Leaves          | Boiled, drink as tea                                                                                              |
|                                                                                      |          | Purify the blod                  | Bark            | Boiled, drink as tea                                                                                              |
| LILIACEAE                                                                            |          |                                  |                 |                                                                                                                   |
| <i>Allium cepa</i> L., MG 343                                                        |          | Food                             | Stems           | Raw or cooked                                                                                                     |

|                                                |                  |                        |                          |                                                                      |
|------------------------------------------------|------------------|------------------------|--------------------------|----------------------------------------------------------------------|
|                                                |                  | Acne                   | Stems                    | Boiled, the bulb layers, put them in the affected area               |
|                                                |                  | Indigestion (children) | Stems                    | Spread in the gum to avoid hindrance                                 |
|                                                |                  | Bronchitis             | Stems                    | Toasted or boiled, drink the solution                                |
|                                                |                  | Give up smoking        | Stems                    | Chew two bulbs mixed with lemon and honey bee, strain and drink      |
| <i>Allium sativum</i> L., MG 310               | Ajo              | Cough                  | Leaves                   | Infusion or tea                                                      |
|                                                |                  | Varices                | Leaves                   | Tea                                                                  |
|                                                |                  | Insect bites           | Leaves                   | Boiled, poultice                                                     |
|                                                |                  | Gastritis              | Two cloves               | Mixed with onion, lemon coriander, take half tea spoon every morning |
|                                                |                  | Arthritis              | Cloves                   | Chewing 1 raw clove                                                  |
|                                                |                  | Constipation           | 3 cloves                 | Boiled, drink the water                                              |
|                                                |                  | Condiment              | Cloves                   | Cook                                                                 |
| <i>Lilium longiflorum</i> Thunb., MG 273       | Lirio            | Ornamental             | Complete plant           | Planted in gardens                                                   |
| LYTHRACEAE                                     |                  |                        |                          |                                                                      |
| <i>Heimia salicifolia</i> (Kunth) Link, MG 274 | Jarilla de río   | Household goods        | Dried stems and branches | To make brooms                                                       |
| MALVACEAE                                      |                  |                        |                          |                                                                      |
| <i>Althaea rosea</i> (L.) Cav., MG 429         | Malvarosa        | Ornamental             | Complete plant           | Planted in gardens, beautiful flowers                                |
| <i>Hibiscus campanulifolius</i> Ulbr., MG 329  | Tulipán          | Ornamental             | Complete plant           | Planted in gardens                                                   |
| <i>Malva parviflora</i> L., MG 342             | Malva de marrano | Intestinal colic       | Leaves                   | Boiled, drink as tea                                                 |
|                                                |                  | Menstrual cramps       | Leaves                   | Boiled, drink as tea                                                 |
|                                                |                  | Constipation           | Leaves                   | Boiled, drink as tea                                                 |

|                                            |          |                                     |                |                                                                                                                      |
|--------------------------------------------|----------|-------------------------------------|----------------|----------------------------------------------------------------------------------------------------------------------|
|                                            |          | Expectorant                         | Leaves         | Boiled, drink as tea                                                                                                 |
|                                            |          | Flu                                 | Leaves         | Boiled, drink as tea                                                                                                 |
|                                            |          | Laxative                            | Branches       | Boiled, drink as tea                                                                                                 |
|                                            |          | Forage                              | Complete plant | Dry, raw                                                                                                             |
| MELIACEAE                                  |          |                                     |                |                                                                                                                      |
| <i>Azadirachta indica</i> A. Juss., MG 387 | Neem     | Diabetes                            | Leaves         | Boiled, drink as tea                                                                                                 |
| MORACEAE                                   |          |                                     |                |                                                                                                                      |
| <i>Ficus carica</i> L., MG 331             | Higuera  | Food                                | Infrutescences | Raw or cooked                                                                                                        |
|                                            |          | Constipation                        | Leaves         | Boiled, half leaf per cup                                                                                            |
|                                            |          | Cough                               | Leaves         | Boiled, drink as tea                                                                                                 |
|                                            |          | Intestinal parasites                | Leaves         | Boiled, drink as tea                                                                                                 |
|                                            |          | Promote milk production in women    | Leaves         | Boiled as tea                                                                                                        |
| <i>Morus celtidifolia</i> Kunth, MG 332    | Mora     | Food                                | Fuits          | Raw                                                                                                                  |
|                                            |          | Hair health                         | Leaves         | Ground, mixed with <i>Fraxinus 34uspidate</i> and <i>Glandularia bipinnatifida</i> , wash the hair with the solution |
| MUSACEAE                                   |          |                                     |                |                                                                                                                      |
| <i>Musa x paradisiaca</i> L., MG 290       | Plátano  | Vaginal infection                   | Peel           | Ground, mixed with two tablespoons of vinegar, applying directly on the affected part                                |
|                                            |          | Food                                | Fruit          | Raw                                                                                                                  |
| MYRTACEAE                                  |          |                                     |                |                                                                                                                      |
| <i>Eucalyptus globulus</i> Labill., MG 386 | Eucalito | Respiratory diseases or expectorant | Leaves         | Boiled, drink as tea, or as poultice                                                                                 |
| <i>Psidium guajava</i> L., MG              | Guayaba  | Food                                | Fruit          | Raw                                                                                                                  |

|                                                 |                  |                   |                     |                                                                                  |
|-------------------------------------------------|------------------|-------------------|---------------------|----------------------------------------------------------------------------------|
| 521                                             |                  |                   |                     |                                                                                  |
|                                                 |                  | Stomach ache      | Leaves              | Boiled, drink as tea                                                             |
| NEPHROLEPIDACEAE                                |                  |                   |                     |                                                                                  |
| <i>Nephrolepis exaltata</i> (L.) Schott, MG 522 | Helecho          | Ornamental        | Complete plant      | Planted in gardens                                                               |
| NOLINACEAE                                      |                  |                   |                     |                                                                                  |
| <i>Dasylyrion texanum</i> Scheele, MG 333       | Sotol            | Forage            | Inflorescences      | Raw                                                                              |
|                                                 |                  | Ornamental        | Complete plant      | Planted in gardens                                                               |
| NYCTAGINACEAE                                   |                  |                   |                     |                                                                                  |
| <i>Bougainvillea spectabilis</i> Willd., MG 451 | Bugambilia       | Ornamental        | Complete plant      | Planted in the gardens, beautiful colored bracts                                 |
| OLEACEAE                                        |                  |                   |                     |                                                                                  |
| <i>Fraxinus cuspidata</i> Torr., MG 430         | Fresno silvestre | Headache          | Leaves              | Boiled, mixed with leaves of <i>Salix bonplandiana</i> , drink the solution      |
|                                                 |                  | Ornamental        | Complete plant      | Planted in gardens                                                               |
|                                                 |                  | Shampoo           | Leaves              | Mixed with leaves of <i>Morus celtidifolia</i> , wash the head with the solution |
| <i>Fraxinus greggii</i> A. Gray, MG 340         | Barreta verde    | Toothache         | Leaves              | Boiled, swish around                                                             |
| <i>Jasminum floridum</i> Bunge, MG 431          | Jazmín           | Ornamental        | Complete plant      | Planted in gardens                                                               |
| <i>Ligustrum japonicum</i> Thunb., MG 289       | Trueno           | Ornamental        | Complete plant      | Planted in gardens                                                               |
| <i>Olea europaea</i> L.                         | Olivo            | Cholesterol       | Leaves              | Boiled, drink as tea                                                             |
| ONAGRACEAE                                      |                  |                   |                     |                                                                                  |
| <i>Oenothera rosea</i> L'Hér. ex Aiton, MG 341  | Hierba del golpe | Hematoma          | Leaves and branches | Boiled, as poultice                                                              |
|                                                 |                  | Inflammation      |                     | Boiled, as poultice                                                              |
|                                                 |                  | Stomach disorders | Branches and leaves | Boiled, drink as tea                                                             |
| PAPAVERACEAE                                    |                  |                   |                     |                                                                                  |

|                                          |                                     |                             |                    |                                                                             |
|------------------------------------------|-------------------------------------|-----------------------------|--------------------|-----------------------------------------------------------------------------|
| <i>Argemone mexicana</i> L.,<br>MG 385   | Cardo                               | Warts and petty             | Sap                | Apply the sap in<br>the affected area                                       |
| PICRAMNIACEAE                            |                                     |                             |                    |                                                                             |
| <i>Picramnia</i> sp., MG 334             | Palo mulato                         | Asthma                      | Leaves and<br>bark | Boiled, drink as<br>tea                                                     |
|                                          |                                     | Expectorant                 | Leaves             | Boiled, drink as<br>tea                                                     |
|                                          |                                     | Body aches                  | leaves             | Boiled, drink as<br>tea                                                     |
|                                          |                                     | Skin infections             | Leaves and<br>sap  | Boiled, as<br>poultice                                                      |
| PINACEAE                                 |                                     |                             |                    |                                                                             |
| <i>Pinus cembroides</i> Zucc.,<br>MG 339 | Pino piñonero                       | Veterinary                  | Resin              | Melted, spread on<br>broken limbs in<br>animals, splinting<br>and bandaging |
|                                          |                                     | Grain                       | Resin              | Applied directly<br>over the grain                                          |
|                                          |                                     | Thorns within<br>the skin   | Resin              | Melted, applied<br>directly over the<br>affected area to<br>extract it      |
|                                          |                                     | Construction                | Wood               | Logs                                                                        |
|                                          |                                     | Fuel                        | Wood               | Dried pieces                                                                |
|                                          |                                     | Timber                      | Wood               | Wood, in pieces                                                             |
|                                          |                                     | Food                        | Seed<br>(piñones)  | Raw                                                                         |
|                                          |                                     | Protect grafts<br>(avocado) | Resin              | Melted resin is<br>spread on the<br>graft union                             |
| PLANTAGINACEAE                           |                                     |                             |                    |                                                                             |
| <i>Plantago major</i> L., MG<br>432      | Llantén or<br>Quelite de<br>llantén | Hemorrhoids                 | Leaves             | Boiled, apply the<br>solution in the<br>affected área                       |
|                                          |                                     | Antibiotic                  | Leaves             | Boiled, drink the<br>solution                                               |
|                                          |                                     | Ingrown<br>toenails         | Leaves             | Boiled, as<br>poultice                                                      |
| POACEAE                                  |                                     |                             |                    |                                                                             |
| <i>Arundo donax</i> L., MG<br>335        | Carrizo                             | Construction                | Stems              | Dried                                                                       |
|                                          |                                     | Living fences               | Complete<br>plant  | Planted in the<br>gardens                                                   |

|                                                 |                     |                       |                  |                                         |
|-------------------------------------------------|---------------------|-----------------------|------------------|-----------------------------------------|
|                                                 |                     | Household goods       | Stem strips      | To make brooms                          |
|                                                 |                     | Ornamental            | Complete plant   | Planted in the gardens                  |
| <i>Avena fatua</i> L., MG 384                   | Avena               | Forage                | Complete plant   | Raw                                     |
| <i>Cymbopogon citratus</i> (DC.) Stapf., MG 338 | Zacte limón         | Respiratory diseases  | Leaves and stems | Boiled, drink as tea                    |
|                                                 |                     | Cancer                | Leaves and stems | Boiled, drink as tea                    |
|                                                 |                     | Kidney diseases       | Leaves and stems | Boiled, drink as tea                    |
|                                                 |                     | Food                  | Leaves and stems | Boiled, drink as tea                    |
| <i>Hordeum vulgare</i> L., MG 288               | Cebada              | Pertussis (tosferina) | Leaves and stems | Boiled, drink solution                  |
|                                                 |                     | Forage                | Leaves and stems | Raw                                     |
|                                                 |                     | Construction          | Leaves and stems | Mixed with mud to make bricks           |
| <i>Saccharum officinarum</i> L., MG 336         | Caña                | Food                  | Sap              | Dried                                   |
|                                                 |                     | Candies               | Sap              | Melted with piloncillo and pecan halves |
| <i>Sorghum halepense</i> (L.) Pers., MG 531     | Sorgo               | Forage                | Complete plant   | Dry, raw                                |
| <i>Triticum aestivum</i> L., MG 337             | Trigo               | Food                  | Seeds            | Ground, to make tortillas               |
|                                                 |                     | Forage                | Complete plant   | Dry, raw                                |
| <i>Zea mays</i> L., MG 433                      | Maíz                | Kidney diseases       | Female flowers   | Styles, boiled, drink as tea            |
|                                                 |                     | Food                  | Fruits           | Boiled, cooked, toasted                 |
|                                                 |                     | Food                  | Bracts           | Dried, used to make tamales             |
|                                                 |                     | Forage                | Leaves, stems    | Raw, ground                             |
| POLEMONIACEAE                                   |                     |                       |                  |                                         |
| <i>Loeselia mexicana</i> (Lam.) Brand, MG 383   | Hierba de la virgen | Estrogen production   | Branches         | Boiled, drink as tea                    |

|                                                                |                                    |                                                             |                                |                                                                              |
|----------------------------------------------------------------|------------------------------------|-------------------------------------------------------------|--------------------------------|------------------------------------------------------------------------------|
| PORTULACACEAE                                                  |                                    |                                                             |                                |                                                                              |
| <i>Portulaca mundula</i> I. M. Johnst., MG 275                 | Verdolaga, amores, amor de un rato | Ornamental                                                  | Complete plant                 | Planted in gardens                                                           |
|                                                                |                                    | Food                                                        | Complete plant (without roots) | Cooked                                                                       |
|                                                                |                                    | Anemia                                                      | Leaves                         | Boiled or cooked                                                             |
|                                                                |                                    | Inflammation                                                | Branches and leaves            | Boiled, drink as tea                                                         |
| PUNICACEAE                                                     |                                    |                                                             |                                |                                                                              |
| <i>Punica granatum</i> L., MG 434                              | Granada                            | Food                                                        | Fruit                          | Raw                                                                          |
|                                                                |                                    | Intestinal parasites                                        | Seeds                          | Boiled, drink the solution                                                   |
|                                                                |                                    | Hemorrhage                                                  | Fruit peel                     | Boil, together with nutshell, drink the solution and also, apply as poultice |
|                                                                |                                    | Skin irritation and allergies (Ivy, <i>Tragia 38amose</i> ) | Leaves                         | Boiled, take a bath with the solution                                        |
| RANUNCULACEAE                                                  |                                    |                                                             |                                |                                                                              |
| <i>Delphinium madrese</i> S. Watson, MG 458                    | Espuela de caballero               | Ornamental                                                  | Complete plant                 | Planted in gardens                                                           |
| RHAMNACEAE                                                     |                                    |                                                             |                                |                                                                              |
| <i>Karwinskia humboldtiana</i> (Schult.) Zucc., MG 287         | Coyotillo, tullidora               | Headache (migraine)                                         | Leaves                         | Ground, as poultice on the head                                              |
| ROSACEAE                                                       |                                    |                                                             |                                |                                                                              |
| <i>Crataegus greggiana</i> var. <i>greggiana</i> Eggl., MG 278 | Tejocote                           | Food                                                        | Fruit                          | Raw or cooked                                                                |
|                                                                |                                    | Cholestrero                                                 | Branches and leaves            | Boiled, drink the solution                                                   |
| <i>Cydonia oblonga</i> Mill., MG 435                           | Membrillo                          | Food                                                        | Fruits                         | Raw or cooked (canned fruits)                                                |
|                                                                |                                    | Alcoholic beverages                                         | Fruits                         | Fermented                                                                    |
|                                                                |                                    | Ornamental                                                  | Complete plant                 | Planted in gardens                                                           |

|                                                       |           |                              |                 |                                                                                                                                                                                                     |
|-------------------------------------------------------|-----------|------------------------------|-----------------|-----------------------------------------------------------------------------------------------------------------------------------------------------------------------------------------------------|
| <i>Eriobotrya japonica</i><br>(Thunb.) Lindl., MG 369 | Níspero   | High pressure                | Leaves          | Boiled, drink as tea                                                                                                                                                                                |
|                                                       |           | Diabetes                     | Leaves          | Boiled, drink as tea                                                                                                                                                                                |
|                                                       |           | Food                         | Fruits          | Raw                                                                                                                                                                                                 |
| <i>Fragaria vesca</i> L., MG 382                      | Fresa     | Food                         | Fruits          | Raw                                                                                                                                                                                                 |
| <i>Lindleya mespiloides</i><br>Schltdl., MG 381       | Pinacate  | Skin infections              | Bark and leaves | Boiled, applied as poultice                                                                                                                                                                         |
|                                                       |           | Cancer prevention            | Leaves          | Boiled, drink as tea                                                                                                                                                                                |
| <i>Malus domestica</i> Borkh.,<br>MG 436              | Manzana   | Food                         | Fruits          | Raw or cooked                                                                                                                                                                                       |
|                                                       |           | Alcoholic beverages          | Fruits          | Fermented                                                                                                                                                                                           |
|                                                       |           | Ornamental                   | Complete plant  | Planted in gardens                                                                                                                                                                                  |
|                                                       |           | Ornamental                   | Complete plants | Planted in gardens                                                                                                                                                                                  |
| <i>Prunus armeniaca</i> L.,<br>MG 370                 | Chabacano | Food                         | Fruit           | Raw or cooked                                                                                                                                                                                       |
|                                                       |           | Ornamental                   | Complete plant  | Planted in gardens                                                                                                                                                                                  |
| <i>Prunus domestica</i> L., MG 371                    | Ciruelo   | Food                         | Fruit           | Raw or cooked                                                                                                                                                                                       |
|                                                       |           | Constipation                 | Fruit           | Cooked                                                                                                                                                                                              |
| <i>Prunus persica</i> (L.)<br>Batsch, MG 372          | Durazno   | Food                         | Fruit           | Raw or cooked                                                                                                                                                                                       |
|                                                       |           | Grains and skin irritation   | Branches        | Boiled, apply as a poultice                                                                                                                                                                         |
|                                                       |           | Intestinal parasites         | Leaves          | Boil them mixed with <i>Matricaria recutita</i> , <i>Artemisia ludoviciana</i> , <i>Mentha piperita</i> and <i>Chenopodium ambrosioides</i> leaves, drink the solution during nine consecutive days |
|                                                       |           | Worms in the skin of animals | Leaves          | Mixed with lime, spread in the                                                                                                                                                                      |

|                                                                                |                  |                         |                |                                                                                                     |
|--------------------------------------------------------------------------------|------------------|-------------------------|----------------|-----------------------------------------------------------------------------------------------------|
|                                                                                |                  |                         |                | affected part                                                                                       |
|                                                                                |                  | Epidermal wounds        | Leaves         | Boiled, mixed with <i>Opuntia 40exicana</i> 40 toasted pulp and oil, spread over the affected area  |
| <i>Prunus serotina</i> ssp. <i>capuli</i> (Cav. ex Spreng.)<br>McVaugh, MG 380 | Capulín          | Anemia                  | Bark           | Boiled, drink solution                                                                              |
|                                                                                |                  | Food                    | Fruits         | Raw                                                                                                 |
|                                                                                |                  | Alcoholic beverages     | Fruits         | Fermented                                                                                           |
|                                                                                |                  |                         |                |                                                                                                     |
|                                                                                |                  |                         |                | Infusion                                                                                            |
|                                                                                |                  |                         |                | Infusion                                                                                            |
| <i>Pyrus communis</i> L., MG 279                                               | Pera             | Food                    | Fruits         | Raw or cooked                                                                                       |
|                                                                                |                  | Ornamental              | Complete plant | Planted in gardens                                                                                  |
| <i>Rosa gallica</i> L., MG 459                                                 | Rosal            | Ornamental              | Complete plant | Planted in gardens                                                                                  |
| <i>Rosa montezumae</i> Humb. & Bonpl. ex Redout & Thory, MG 379                | Rosa de castilla | Intestinal colic        | Leaves         | Boiled, drink as tea                                                                                |
|                                                                                |                  | Diabetes                | Leaves         | Boiled, drink as tea                                                                                |
|                                                                                |                  | Gastritis               | Leaves         | Boiled, drink as tea                                                                                |
|                                                                                |                  | Constipation (children) | Petals         | Boiled, mixed with <i>Matricaria recutita</i> and <i>Artemisia ludoviciana</i> leaves, drink as tea |
|                                                                                |                  | Stomach ache            | Leaves         | Boiled, drink as tea                                                                                |
|                                                                                |                  | Inflammation            | Leaves         | Boiled, drink as tea                                                                                |
|                                                                                |                  | Food                    | Petals         | Raw (sweet flavor)                                                                                  |
| <i>Rubus</i> aff. <i>humistratus</i> Steud., MG 280                            | Zarzamora        | Food                    | Fruits         | Raw                                                                                                 |

|                                                        |                         |                         |                         |                                               |
|--------------------------------------------------------|-------------------------|-------------------------|-------------------------|-----------------------------------------------|
|                                                        |                         |                         |                         |                                               |
| <b>RUTACEAE</b>                                        |                         |                         |                         |                                               |
| <i>Casimiroa greggii</i> (S. Watson) F. Chiang, MG 410 | Manguito, zapote blanco | Cholesterol             | Leaves                  | Boiled, drink as tea                          |
|                                                        |                         | Insomnia                | Leaves                  | Boiled, drink as tea                          |
| <i>Citrus paradisi</i> Macfad., MG 460                 | Toronja                 | Food                    | Fruits                  | Raw                                           |
| <i>Citrus limon</i> (L.) Osbeck, MG 378                | Limón                   | Food                    | Fruits                  | Raw                                           |
|                                                        |                         | Sore tonsils            | Leaves                  | Boiled, drink as tea                          |
|                                                        |                         | Expectorant             | Fruits                  | Juice mixed with canela bark                  |
|                                                        |                         | Cataracts               | Fruits                  | Add lemon drops in eyes                       |
|                                                        |                         | Purify blood            | Fruits                  | Lemon juice for nine days on an empty stomach |
| <i>Citrus nobilis</i> Lour., MG 461                    | Mandarina               | Food                    | Fruits                  | Raw                                           |
| <i>Citrus sinensis</i> (L.) Osbeck, MG 411             | Naranja                 | Food                    | Fruits                  | Raw                                           |
|                                                        |                         | Insomnia                | Leaves                  | Boiled, drink as tea                          |
|                                                        |                         | Nervousness             |                         | Boiled, drink as tea                          |
|                                                        |                         | Condiment               |                         | Orange juice, used to seasoning the meat      |
|                                                        |                         | Kidney diseases         | Leaves                  | Boiled, drink as tea                          |
| <i>Helietta parvifolia</i> (A. Gray) Benth., MG 377    | Barreta                 | Construction and timber | Stems and branches      | Dried                                         |
|                                                        |                         | Fences                  | Stems and branches      | Dried                                         |
|                                                        |                         | Fuel                    | Stems and branches      | Dried                                         |
|                                                        |                         | Household goods         | Stems and bbranches     | Dried                                         |
|                                                        |                         | Toothache               | Leaves and bark; Leaves | Chew or boiled,drink as                       |

|                                            |        |                          |                     |                                                                   |
|--------------------------------------------|--------|--------------------------|---------------------|-------------------------------------------------------------------|
|                                            |        |                          |                     | infusion                                                          |
|                                            |        | Prostate                 | Leaves and bark     | Boiled, drink as tea every four hours for a week                  |
| <i>Ruta chalepensis</i> L., MG 281         | Ruda   | Abortive                 | Leaves              | Boiled, drink the solution                                        |
|                                            |        | Colic                    | Leaves              | Boiled, drink the solution                                        |
|                                            |        | Rheumatism               | Leaves              | Boiled, as poultice, applying directly on the affected area       |
|                                            |        | Arthritis                | Branches and leaves | Into alcohol, as poultice, applying directly on the affected area |
|                                            |        | Earache                  | Leaves              | Boiled, put drops in the ear hole                                 |
|                                            |        | Breast firming           | Leaves              | Boiled, applying the solution directly on the breast              |
|                                            |        | Skin infections          | Leaves              | Boiled, as poultice, applying directly on the affected area       |
|                                            |        | Ceremonial               | Complete plant      | For good luck                                                     |
|                                            |        | Frigthen                 | Complete plant      | Pass the plant on the body                                        |
|                                            |        | Ornamental               | Complete plant      | Planted in gardens                                                |
| <i>Zanthoxylum fagara</i> Marshall, MG 412 | Colima | Numb gums                | Dried branches      | Boiled, drink the solution                                        |
|                                            |        | Constipation in children | Leaves and branches | Boiled, drink the solution                                        |
|                                            |        | Upset stomach            | Branches            | Boiled, drink the solution                                        |
|                                            |        | Rheumatism               | Branches            | Boiled, apply as poultice                                         |
| SALICACEAE                                 |        |                          |                     |                                                                   |
| <i>Populus deltoides</i> Marshall, MG 437  | Álamo  | Ornamental               | Plant               | Planted in the gardens                                            |
|                                            |        | Veterinary               | Leaves              | Boiled with                                                       |

|                                                                       |             |                 |                     |                                                                                                                            |
|-----------------------------------------------------------------------|-------------|-----------------|---------------------|----------------------------------------------------------------------------------------------------------------------------|
|                                                                       |             |                 |                     | manzanilla, and hierbabuena; freshly calved animals, to shed the remnants of placenta                                      |
| <i>Salix humboldtiana</i><br>Willd., MG 438                           | Sauce       | Timber          | Wood                | Logs                                                                                                                       |
|                                                                       |             | Ornamental      | Complete plant      | Planted in gardens                                                                                                         |
|                                                                       |             | Healthy hair    | Leaves              | Boiled, mixed with <i>Glandularia bipinnatifida</i> and <i>Fraxinus cuuspidata</i> leaves, wash the hair with the solution |
|                                                                       |             | Ceremonial      | Branches and leaves | Dried, pass the plant on the body                                                                                          |
| SAPINDACEAE                                                           |             |                 |                     |                                                                                                                            |
| <i>Dodonaea viscosa</i> (L.)<br>Jacq., MG 376                         | Jarrón      | Alergies        | Leaves              | Boiled, as poultice, applied in the affected part                                                                          |
| <i>Koelreuteria paniculata</i><br>Laxm., MG 356                       | Alfombrilla | Ornamental      | Complete plant      | Planted in the gardens                                                                                                     |
| SAPOTACEAE                                                            |             |                 |                     |                                                                                                                            |
| <i>Sideroxylon lanuginosum</i><br>Michx., MG 523                      | Coma        | Food            | Fruits              | Chew as chewing gum                                                                                                        |
|                                                                       |             | Beverage        | Fruits              | Ground, mixed with water, as softdrink                                                                                     |
| SCROPHULARIACEAE                                                      |             |                 |                     |                                                                                                                            |
| <i>Leucophyllum frutescens</i><br>(Berland.) I. M. Johnst.,<br>MG 282 | Cenizo      | Kidney diseases | Leaves and branches | Boiled, drikn the solution                                                                                                 |
|                                                                       |             | Cough           | Leaves              | Infusion                                                                                                                   |
|                                                                       |             | Hepatitis       | Leaves              | Wahes and infusion and, add aslo dried branches and leaves in the bed and under the pillow and sleep                       |

|                                                                                       |               |                                     |                    |                                                                      |
|---------------------------------------------------------------------------------------|---------------|-------------------------------------|--------------------|----------------------------------------------------------------------|
|                                                                                       |               |                                     |                    | on them                                                              |
|                                                                                       |               | Jitters                             | Leaves             | Rub the plant on the body                                            |
|                                                                                       |               | Ceremonial                          | Dried plant        | Rub the dried plant on the body                                      |
|                                                                                       |               | Living fences                       | Complete plant     | Planted in gardens                                                   |
|                                                                                       |               | Skin diseases                       | leaves             | Boiled with salt, take three baths at day                            |
|                                                                                       |               | Ornamental                          | Complete plant     | Planted in the gardens                                               |
|                                                                                       |               | Forage                              | Leaves and flowers | Dried, raw                                                           |
| <b>SELAGINELLACEAE</b>                                                                |               |                                     |                    |                                                                      |
| <i>Selaginella pilifera</i> A. Braun, MG 357                                          | Flor de peña  | Cleaning of urinary tract           | Leaves             | Boiled, drink as tea                                                 |
| <b>SIMAROUBACEAE</b>                                                                  |               |                                     |                    |                                                                      |
| <i>Castella erecta</i> subsp. Texana (Torr. & A. Gray) Cronquist, MG 439              | Bisbirinda    | Amoebiasis                          | Leaves and stems   | Infusion, 4-5 leaves only, has a very bitter taste and it astringent |
|                                                                                       |               | Anticancer                          | Leaves             | Infusion                                                             |
| <b>SIMMONDSIACEAE</b>                                                                 |               |                                     |                    |                                                                      |
| <i>Simmondsia chinensis</i> Nutt., MG 358                                             | Jojoba        | Shampoo                             | Root, Sap          | Ground, spread on the hair                                           |
| <b>SMILACEAE</b>                                                                      |               |                                     |                    |                                                                      |
| <i>Smilax bona-nox</i> L., MG 440                                                     | Zarzaparrilla | Blood circulation, purify the blood | Root               | Ground, boiled, drink as tea                                         |
|                                                                                       |               | Grains                              | Root               | Ground, boiled, drink as tea                                         |
| <b>SOLANACEAE</b>                                                                     |               |                                     |                    |                                                                      |
| <i>Capsicum annuum</i> var. <i>glabriusculum</i> (Dunal) Heiser & Pickersgill, MG 376 | Chile piquín  | Condiment                           | Fruit              | Food flavoring, raw or cooked                                        |
| <i>Capsicum frutescens</i> L., MG 524                                                 | Chile japonés | Condiment                           | Fruit              | Food flavoring, raw or cooked                                        |
| <i>Datura stramonium</i> L., MG 283                                                   | Toloache      | Make a person fall in love with me  | Leaves and seeds   | Ground, spread in the food                                           |
| <i>Lycopersicon esculentum</i> Mill., MG 525                                          | Tomate cherry | Food                                | Fruit              | Raw or cooked                                                        |

|                                               |                                       |                                  |                              |                                                                                                   |
|-----------------------------------------------|---------------------------------------|----------------------------------|------------------------------|---------------------------------------------------------------------------------------------------|
| <i>Nicotiana glauca</i><br>Graham, MG 284     | Gigante                               | Headache,<br>migriane            | Leaves                       | Spread with fat<br>and place in the<br>parietal                                                   |
| <i>Nicotiana tabacum</i> L.,<br>MG 467        | Tabaco                                | Smoke                            | Leaves                       | Dry, ground                                                                                       |
| <i>Physalis philadelphica</i><br>Lam., MG 359 | Tomate de<br>fresadilla,<br>tomatillo | Food and<br>condiment            | Fruit                        | Raw or cooked                                                                                     |
| <i>Solanum douglasii</i><br>Dunal, MG 375     | Hierba del<br>ratón                   | Rat poison                       | Leaves                       | Ground, spread on<br>floor                                                                        |
| <i>Solanum elaeagnifolium</i><br>Cav., MG 466 | Trompillo                             | Cataracts                        | Seeds                        | Ground, applying<br>directly into eyes                                                            |
| <i>Solanum tuberosum</i> L.,<br>MG 360        | Papa                                  | Food                             | Roots                        | Cooked                                                                                            |
|                                               |                                       | gastritis                        | Roots                        | Liquefied, raw                                                                                    |
| TROPAEOLACEAE                                 |                                       |                                  |                              |                                                                                                   |
| <i>Tropaeolum majus</i> L.,<br>MG 285         | Mastuerzo                             | Headache                         | Leaves                       | Ground, mixed<br>with Vaporub and<br>spread in the<br>occipital                                   |
| TURNERACEAE                                   |                                       |                                  |                              |                                                                                                   |
|                                               | Damiana, yeba<br>del venado           | Colic cramps                     | Leaves                       | Boiled, drink the<br>solution                                                                     |
| <i>Turnera diffusa</i> Willd.,<br>MG 374      |                                       | Diabetes                         | Leaves and<br>flowers        | Boiled, drink the<br>solution                                                                     |
|                                               |                                       | Stimulate<br>fertily in<br>women | Leaves, stems<br>and flowers | Boiled, drink the<br>solution                                                                     |
|                                               |                                       | Intestinal<br>infection          | Leaves                       | Boiled, drink the<br>solution                                                                     |
|                                               |                                       | Insomnia                         | Leaves                       | Boiled, drink the<br>solution                                                                     |
|                                               |                                       | Backache                         | Leaves                       | Boiled, drink the<br>solution                                                                     |
|                                               |                                       | Impotence                        | Dried flowers<br>and leaves  | Mixed with dried<br>leaves of<br><i>Chrysactinia<br/>mexicana</i> , boiled,<br>drink the solution |
|                                               |                                       | High pressure                    | Leaves                       | Boiled, drink the<br>solution                                                                     |
|                                               |                                       | Kidney<br>diseases               | Leaves                       | Boiled, drink as<br>tea                                                                           |
|                                               |                                       | Matrix<br>inflamated             | Leaves                       | Boiled, drink as<br>tea                                                                           |

|                                                          |             |                     |                  |                                                                                                                     |
|----------------------------------------------------------|-------------|---------------------|------------------|---------------------------------------------------------------------------------------------------------------------|
|                                                          |             | Headache            | Root             | Ground, boiled, drink the solution                                                                                  |
|                                                          |             | Skin diseases       | Branches         | Boiled, drink as tea                                                                                                |
|                                                          |             | Grains              | Branches         | Boiled, drink as tea                                                                                                |
|                                                          |             | High fever          | Branches         | Boiled, drink as tea                                                                                                |
|                                                          |             | Ornamental          | Complete plant   | Planted in gardens                                                                                                  |
| <b>TYPHACEAE</b>                                         |             |                     |                  |                                                                                                                     |
| <i>Typha latifolia</i> L., MG 465                        | Tule        | Handcrafts          | Leaves and stems | Fresh tissues, easier to work with the hands (if leaves and stems are dry, the handcraft could break)               |
| <b>ULMACEAE</b>                                          |             |                     |                  |                                                                                                                     |
| <i>Celtis laevigata</i> Willd, MG 360                    | Palo blanco | Timber              | Wood             | Pieces                                                                                                              |
|                                                          |             | Fences              | Wood             | Pieces                                                                                                              |
|                                                          |             | Fuel                | Wood             | Dried                                                                                                               |
| <i>Celtis pallida</i> Torr., MG 526                      | Granjeno    | Food                | Fruit            | Raw or as syrup                                                                                                     |
|                                                          |             | Forage              | Leaves           | Raw                                                                                                                 |
|                                                          |             | Timber              | Wood             | Dried pieces                                                                                                        |
| <b>USTILAGINACEAE (Fungus)</b>                           |             |                     |                  |                                                                                                                     |
| <i>Ustilago maydis</i> (D. C.) Corda, MG 361             | Huitlacoche | Food                | All tissues      | Cooked                                                                                                              |
| <b>VERBENACEAE</b>                                       |             |                     |                  |                                                                                                                     |
| <i>Glandularia bipinnatifida</i> (Schauer) Nutt., MG 464 | Moradilla   | Alopecia            | Complete plant   | Boiled, mixed with <i>Morus celtidifolia</i> and <i>Fraxinus 46uspidate</i> leaves, wash the head with the solution |
| <i>Lantana camara</i> L., MG 441                         | Lantana     | Ornamental          | Complete plant   | Planted in gardens                                                                                                  |
| <i>Lippia graveolens</i> Kunth, MG 442                   | Pionia      | Asthma (bronchitis) | Leaves           | Boiled, drink as tea                                                                                                |
|                                                          |             | Kidney              | Leaves           | Boiled, drink as                                                                                                    |

|                                                  |         |                       |          |                                                                                                                                                                                              |
|--------------------------------------------------|---------|-----------------------|----------|----------------------------------------------------------------------------------------------------------------------------------------------------------------------------------------------|
|                                                  |         | diseases              |          | tea                                                                                                                                                                                          |
|                                                  |         | Matrix inflamated     | Leaves   | Boiled, drink as tea                                                                                                                                                                         |
|                                                  |         | Headache              | Root     | Ground, boiled, drink the solution                                                                                                                                                           |
|                                                  |         | Rheumatism            | Root     | Ground, boiled, drink the solution                                                                                                                                                           |
| <i>Poliomintha longiflora</i><br>A. Gray, MG 362 | Orégano | Expectorant           | Leaves   | Boiled, drink as tea                                                                                                                                                                         |
|                                                  |         | Respeiratory diseases | Leaves   | Boiled, drink as tea                                                                                                                                                                         |
|                                                  |         | Laryngitis            | Leaves   | Boiled, drink as tea                                                                                                                                                                         |
|                                                  |         | Flu                   | Leaves   | Boiled, drink as tea                                                                                                                                                                         |
|                                                  |         | Cough                 | Leaves   | Boiled, drink as tea                                                                                                                                                                         |
|                                                  |         | Condiment             | Leaves   | Boiled, drink as tea                                                                                                                                                                         |
| <i>Verbena carolina</i> L., MG 443               | Verbena | Migraine              | Branches | Boiled, drink as tea                                                                                                                                                                         |
|                                                  |         | Skin diseases         | Branches | Boiled, drink as tea                                                                                                                                                                         |
|                                                  |         | Grains                | Branches | Boiled, drink as tea                                                                                                                                                                         |
|                                                  |         | High fever            | Branches | Boiled, drink as tea                                                                                                                                                                         |
|                                                  |         | Typhoid               | Branches | Boiled, drink as tea                                                                                                                                                                         |
|                                                  |         | Varicella             | Branches | Boiled, as poultice, over the body                                                                                                                                                           |
|                                                  |         | Constipation          | Branches | Boiled, as poultice in the stomach or, in children, mixed with <i>Agave lophantha</i> root and <i>Borago officinalis</i> leaves, blend and strain the mixture, introduce the remnants anally |

|                                                                |                             |                 |                     |                                                                                                  |
|----------------------------------------------------------------|-----------------------------|-----------------|---------------------|--------------------------------------------------------------------------------------------------|
|                                                                |                             |                 |                     | (colonic)                                                                                        |
|                                                                |                             | Ceremonial      | Complete plant      | Bouquets                                                                                         |
| <i>Verbena officinalis</i> L., MG 444                          | Santa Isabel                | Forage          | Complete plant      | Dried, raw                                                                                       |
| VIOLACEAE                                                      |                             |                 |                     |                                                                                                  |
| <i>Viola tricolor</i> L., MG 463                               | Violeta, pensamientos       | Ornamental      | Complete plant      | Planted in gardens                                                                               |
| VISCACEAE                                                      |                             |                 |                     |                                                                                                  |
| <i>Phoradendron villosum</i> (Nutt.) Nutt. ex Engelm., MG 445  | Injerto                     | Veterinary      | Leaves and branches | Boiled, mixed with salt, drink the solution to the goats to shed the remnants of the placenta    |
| VITACEAE                                                       |                             |                 |                     |                                                                                                  |
| <i>Vitis cinerea</i> (Engelm.) Engelm. ex Millardet, MG 462    | Uva cimarrona, uva de monte | Food            | Fuits               | Grapes, raw                                                                                      |
|                                                                |                             | Ornamental      | Complete plant      | Planted in gardens                                                                               |
| ZYNGIBERACEAE                                                  |                             |                 |                     |                                                                                                  |
| <i>Zingiber officinale</i> Roscoe, MG 528                      | Jenjibre or jalapeñas       | Gastritis       | Branches            | Boiled, drink as tea                                                                             |
| ZYGOPHYLLACEAE                                                 |                             |                 |                     |                                                                                                  |
| <i>Larrea tridentata</i> (Sessé & Moc. ex DC.) Coville, MG 286 | Gobernadora                 | Stomach ache    | Leaves              | Boiled, Put 5-6 leaves in a quart of boiling water for 20 seconds (is very strong), drink as tea |
|                                                                |                             | Kidney diseases | Leaves              | Boiled, Put 5-6 leaves in a quart of boiling water for 20 seconds (is very strong), drink as tea |
|                                                                |                             | Constipation    | Leaves              | Boiled, Put 5-6 leaves in a quart of boiling water for 20 seconds (is very strong), drink as tea |
|                                                                |                             | Smelly feet     |                     |                                                                                                  |

|  |  |                        |                     |                                                                       |
|--|--|------------------------|---------------------|-----------------------------------------------------------------------|
|  |  | Antifungal             | Leaves              | Ground, use as talc, inside shoes or spreading feet                   |
|  |  | Car cleaning radiators | Leaves and branches | Put branches and leaves in water for a day, pour it into the radiator |
|  |  | Drain cleaning         | Leaves and branches | Put branches and leaves in water for a day, pour it into the radiator |
